# Supplementary material for: Quantifying predictors for the spatial diffusion of avian influenza virus in China
Source: PubMed Central journal article supplement (PMC5237338; doi:10.1186/s12862-016-0845-3), 2017-01-13
Supplement: 12862_2016_845_MOESM1_ESM.pdf [file 12862_2016_845_MOESM1_ESM.pdf]

## Additional Tables

**Table S1 Tree model fit comparison**

| Models                   | PS <sup>a</sup> | SS <sup>a</sup> | AICM <sup>b</sup> | HME <sup>c</sup> |
|--------------------------|-----------------|-----------------|-------------------|------------------|
| Constant size model      | -44221          | -34077          | 99146             | -49262           |
| Exponential Growth model | -55811          | -55185          | 112154            | -54224           |
| Bayesian skyline model   | -55779          | -55392          | 109102            | -54290           |
| Bayesian skyride model   | -47568          | -41709          | 99382             | -49275           |

<sup>a</sup> The estimated log marginal likelihood using path sampling (PS) and stepping stone sampling (SS), lower absolute values of marginal likelihood indicate a better fit to the data.

<sup>b</sup> The likelihood using Akaike's Information Criterion for MCMC samples (AICM), lower values of marginal likelihood indicate a better fit to the data.

<sup>c</sup> The estimated harmonic marginal likelihood of posterior (HME), lower absolute values of marginal likelihood indicate a better fit to the data.

**Table S2 Classification of provinces into areas in 4 region types**

| Region | Area                        | Provinces                                                                            |
|--------|-----------------------------|--------------------------------------------------------------------------------------|
| TR     | East                        | Anhui, Fujian, Jiangsu, Jiangxi, Shandong, Shanghai, Zhejiang                        |
|        | North                       | Beijing, Hebei, Shanxi                                                               |
|        | NorthEast                   | Heilongjiang, Jilin, Liaoning                                                        |
|        | NorthWest                   | Gansu, Ningxia, Qinghai, Shaanxi, Xinjiang                                           |
|        | SouthCentral                | Guangdong, Guangxi, Henan, Hubei, Hunan                                              |
|        | SouthWest                   | Guizhou, Sichuan, Tibet, Yunnan                                                      |
| ER     | Central                     | Anhui, Henan, Hubei, Hunan, Jiangxi, Shanxi                                          |
|        | EastCoast                   | Beijing, Fujian, Guangdong, Hebei, Jiangsu, Shandong, Shanghai, Zhejiang             |
|        | NorthEast                   | Heilongjiang, Jilin, Liaoning                                                        |
|        | Western                     | Gansu, Guangxi, Guizhou, Ningxia, Qinghai, Shaanxi, Sichuan, Tibet, Xinjiang, Yunnan |
| ED     | BER (Bohai Economic Rim)    | Beijing, Hebei, Shandong                                                             |
|        | Central                     | Anhui, Henan, Hubei, Hunan, Jiangxi, Shanxi                                          |
|        | NorthEast                   | Heilongjiang, Jilin, Liaoning                                                        |
|        | NorthWest                   | Gansu, Ningxia, Qinghai, Shaanxi, Xinjiang                                           |
|        | PRD (Pan-Pearl River Delta) | Fujian, Guangdong                                                                    |
|        | SouthWest                   | Guangxi, Guizhou, Sichuan, Tibet, Yunnan                                             |
|        | YRD (Yangtze River Delta)   | Jiangsu, Shanghai, Zhejiang                                                          |
| CAR    | Central                     | Hubei, Hunan, Jiangxi                                                                |
|        | East                        | Anhui, Jiangsu, Shanghai, Zhejiang                                                   |
|        | North                       | Beijing, Hebei, Henan, Shandong, Shanxi                                              |
|        | NorthEast                   | Heilongjiang, Jilin, Liaoning                                                        |
|        | NorthWest                   | Gansu, Ningxia, Shaanxi, Xinjiang                                                    |
|        | Plateau                     | Qinghai, Tibet                                                                       |
|        | South                       | Fujian, Guangdong, Guangxi                                                           |
|        | SouthWest                   | Guizhou, Sichuan, Yunnan                                                             |

**Table S3 Results of trait-phylogeny association for different segments**

| Statistic |           | Observed mean        | Null mean              | P-value           |       |
|-----------|-----------|----------------------|------------------------|-------------------|-------|
| AI        | PB2       | 11.57 (10.8, 12.36)  | 22.8 (20.6, 24.8)      | <0.001            |       |
|           | PB1       | 14.35 (13.4, 15.25)  | 23.21 (21.26, 25.22)   | <0.001            |       |
|           | PA        | 13.53 (12.64, 14.34) | 22.8 (20.6, 24.8)      | <0.001            |       |
|           | NP        | 12.67 (11.62, 13.74) | 22.42 (20.67, 25)      | <0.001            |       |
|           | M         | 15.76 (14.5, 16.71)  | 22.95(21.14, 24.71)    | <0.001            |       |
|           | NS        | 17.67 (16.43, 18.95) | 23.3 (21.46, 25.29)    | <0.001            |       |
| PS        | PB2       | 96.87 (95, 99)       | 148.6 (141.7, 155.3)   | <0.001            |       |
|           | PB1       | 106.60 (105, 109)    | 148.5 (141.1, 155.1)   | <0.001            |       |
|           | PA        | 105.06 (102, 108)    | 148.6 (141.7, 155.3)   | <0.001            |       |
|           | NP        | 103.4 (101, 106)     | 148.4 (141.45, 154.75) | <0.001            |       |
|           | M         | 113.2 (110, 116)     | 148.4 (141.52, 154.9)  | <0.001            |       |
|           | NS        | 117.61 (114, 121)    | 148.4 (141.96, 154.9)  | <0.001            |       |
| MC        | EastCoast | PB2                  | 20 (19.98, 20)         | 4.14 (3, 6)       | 0.001 |
|           |           | PB1                  | 12.97 (12.9, 13)       | 4.2 (3, 6)        | 0.001 |
|           |           | PA                   | 10.09 (10, 11)         | 4.15 (3, 6)       | 0.002 |
|           |           | NP                   | 13.95 (13.9, 14)       | 4.11 (3, 6)       | 0.001 |
|           |           | M                    | 9.11 (8, 12)           | 4.3 (3, 6)        | 0.005 |
|           |           | NS                   | 7.68 (5, 10)           | 4.2 (3, 6)        | 0.002 |
|           | Central   | PB2                  | 4 (3.9, 4)             | 3.07 (2, 4)       | 0.12  |
|           |           | PB1                  | 6.42 (6, 7)            | 3.11 (2, 4)       | 0.01  |
|           |           | PA                   | 4.11 (3.9, 4)          | 3.11 (2, 4.2)     | 0.13  |
|           |           | NP                   | 6 (6, 6)               | 3.1 (2.07, 4.17)  | 0.008 |
|           |           | M                    | 5 (4.9, 5)             | 3.12 (2.23, 4.21) | 0.01  |
|           |           | NS                   | 6.12 (6, 7)            | 3.13 (2.23, 4.24) | 0.004 |
|           | Western   | PB2                  | 6.99 (6.9, 7)          | 2.38 (2, 3)       | 0.1   |
|           |           | PB1                  | 3 (3, 3)               | 2.38 (2, 3)       | 0.2   |
|           |           | PA                   | 4 (3.9, 4)             | 2.38 (2, 3)       | 0.17  |
|           |           | NP                   | 3 (2.9, 3)             | 2.37 (2, 3)       | 0.14  |
|           |           | M                    | 3 (3, 3)               | 2.37 (2, 3)       | 0.15  |
|           |           | NS                   | 3 (3, 3)               | 2.38 (2, 3)       | 0.14  |
|           | Northeast | PB2                  | 3 (2.9, 3)             | 1.22 (1, 2)       | 0.001 |
|           |           | PB1                  | 2.02 (1.9, 2)          | 1.22 (1, 2)       | 0.1   |
|           |           | PA                   | 3 (3, 3)               | 1.22 (1, 2)       | 0.003 |
| NP        |           | 4.27 (3, 7)          | 1.97 (1.25, 2)         | 0.001             |       |
| M         |           | 2.97 (2.9, 3)        | 1.21 (1, 2)            | 0.003             |       |
| NS        |           | 1.34 (1, 2)          | 1.22 (1, 2)            | 0.1               |       |

**Table S4 Estimation of evolution parameters of different segments**

| Segment | TMRCAs (year) |                        | Evo.rate ( $\times 10^{-03}$ subs/s/y) |                        |
|---------|---------------|------------------------|----------------------------------------|------------------------|
|         | mean          | (95% HPD lower, upper) | mean                                   | (95% HPD lower, upper) |
| PB2     | 1960          | (1941, 1977)           | 4.36                                   | (3.84, 4.92)           |
| PB1     | 1966          | (1951, 1977)           | 3.15                                   | (2.73, 3.64)           |
| PA      | 1960          | (1941, 1976)           | 3.41                                   | (2.95, 3.85)           |
| NP      | 1951          | (1935, 1976)           | 3.32                                   | (2.84, 3.87)           |
| M       | 1955          | (1931, 1975)           | 2.47                                   | (2.06, 2.90)           |
| NS      | 1553          | (1175, 1836)           | 1.66                                   | (1.27, 1.96)           |

**Table S5 Host type and Subtype correlation with Sample Size**

| Number of Host and Subtype Samples |                              | Sample Size | Domestic | Domestic Gal | H5N1  | H9    | H6    |
|------------------------------------|------------------------------|-------------|----------|--------------|-------|-------|-------|
|                                    | Total                        | 320         | 260      | 107          | 102   | 61    | 76    |
|                                    | Fraction of Total            |             | 0.81     | 0.33         | 0.32  | 0.19  | 0.24  |
| Region                             | Area                         | Sample Size | Domestic | Domestic Gal | H5N1  | H9    | H6    |
| <b>TR</b>                          | East                         | 119         | 98       | 44           | 22    | 29    | 24    |
|                                    | North                        | 14          | 13       | 10           | 5     | 6     | 0     |
|                                    | NorthEast                    | 16          | 6        | 6            | 9     | 2     | 0     |
|                                    | NorthWest                    | 16          | 10       | 10           | 14    | 2     | 0     |
|                                    | SouthCentral                 | 134         | 115      | 32           | 43    | 20    | 45    |
|                                    | SouthWest                    | 21          | 18       | 5            | 9     | 2     | 7     |
|                                    | Correlation with Sample Size |             | 0.998    | 0.936        | 0.894 | 0.932 | 0.952 |
| <b>ER</b>                          | Central                      | 98          | 77       | 24           | 36    | 11    | 22    |
|                                    | EastCoast                    | 141         | 125      | 58           | 29    | 41    | 34    |
|                                    | NorthEast                    | 16          | 6        | 6            | 9     | 2     | 0     |
|                                    | Western                      | 65          | 52       | 19           | 28    | 7     | 20    |
|                                    | Correlation with Sample Size |             | 0.998    | 0.940        | 0.776 | 0.887 | 0.972 |
| <b>ED</b>                          | BER                          | 30          | 27       | 23           | 9     | 18    | 0     |
|                                    | Central                      | 98          | 77       | 24           | 36    | 11    | 22    |
|                                    | NorthEast                    | 16          | 6        | 6            | 9     | 2     | 0     |
|                                    | NorthWest                    | 16          | 10       | 10           | 14    | 2     | 0     |
|                                    | PRD                          | 65          | 56       | 14           | 12    | 10    | 33    |
|                                    | SouthWest                    | 49          | 42       | 9            | 14    | 5     | 20    |
|                                    | YRD                          | 46          | 42       | 21           | 8     | 13    | 1     |
|                                    | Correlation with Sample Size |             | 0.987    | 0.562        | 0.781 | 0.368 | 0.763 |
| <b>CAR</b>                         | Central                      | 86          | 65       | 15           | 28    | 8     | 22    |
|                                    | East                         | 50          | 46       | 22           | 11    | 13    | 1     |
|                                    | North                        | 38          | 35       | 31           | 14    | 21    | 0     |
|                                    | NorthEast                    | 16          | 6        | 6            | 9     | 2     | 0     |
|                                    | NorthWest                    | 10          | 10       | 10           | 8     | 2     | 0     |
|                                    | Plateau                      | 13          | 4        | 3            | 10    | 2     | 0     |
|                                    | South                        | 93          | 80       | 18           | 17    | 13    | 46    |
|                                    | SouthWest                    | 14          | 14       | 2            | 5     | 0     | 7     |
|                                    | Correlation with Sample Size |             | 0.984    | 0.516        | 0.839 | 0.560 | 0.839 |

**Table S6 Transmission rate and statistical support between areas from Traditional Regions**

|            |                    |              |              |              |              |
|------------|--------------------|--------------|--------------|--------------|--------------|
| <b>PB2</b> | <b>Origin</b>      | SouthCentral | East         | SouthCentral | SouthCentral |
|            | <b>Destination</b> | East         | SouthCentral | Northwest    | Southwest    |
|            | <b>Mean rate</b>   | 0.47         | 0.24         | 0.35         | 0.1          |
|            | <b>Indicator</b>   | 1            | 0.84         | 0.84         | 0.84         |
|            | <b>BF</b>          | 3703         | 6            | 6            |              |
| <b>PB1</b> | <b>Origin</b>      | SouthCentral | SouthCentral |              |              |
|            | <b>Destination</b> | East         | Southwest    |              |              |
|            | <b>Mean rate</b>   | 0.49         | 0.1          |              |              |
|            | <b>Indicator</b>   | 1            | 0.81         |              |              |
|            | <b>BF</b>          | 1233         | 5            |              |              |
| <b>PA</b>  | <b>Origin</b>      | SouthCentral | Northeast    | SouthCentral |              |
|            | <b>Destination</b> | East         | Northwest    | Northwest    |              |
|            | <b>Mean rate</b>   | 0.33         | 0.96         | 0.1          |              |
|            | <b>Indicator</b>   | 1            | 0.86         | 0.89         |              |
|            | <b>BF</b>          | 426          | 8            | 10           |              |
| <b>NP</b>  | <b>Origin</b>      | SouthCentral | SouthCentral | SouthCentral |              |
|            | <b>Destination</b> | East         | Northwest    | Southwest    |              |
|            | <b>Mean rate</b>   | 0.42         | 0.13         | 0.14         |              |
|            | <b>Indicator</b>   | 0.91         | 0.88         | 0.87         |              |
|            | <b>BF</b>          | 410          | 9            | 8            |              |
| <b>M</b>   | <b>Origin</b>      | SouthCentral | Southwest    |              |              |
|            | <b>Destination</b> | East         | Northwest    |              |              |
|            | <b>Mean rate</b>   | 0.44         | 1.92         |              |              |
|            | <b>Indicator</b>   | 1            | 0.88         |              |              |
|            | <b>BF</b>          | 1233         | 9            |              |              |
| <b>NS</b>  | <b>Origin</b>      | SouthCentral | Southwest    |              |              |
|            | <b>Destination</b> | East         | Northwest    |              |              |
|            | <b>Mean rate</b>   | 0.49         | 1.32         |              |              |
|            | <b>Indicator</b>   | 1            | 0.8          |              |              |
|            | <b>BF</b>          | 1233         | 5            |              |              |

States=6; only transitions with BF support > 5 are shown

**Table S7 Transmission rate and statistical support between areas from Economic Development Zones**

|             |                    |            |            |            |            |            |            |            |      |
|-------------|--------------------|------------|------------|------------|------------|------------|------------|------------|------|
| <b>PB 2</b> | <b>Origin</b>      | South west | YRD        | PRD        | Central    | Central    | South west | South west | PRD  |
|             | <b>Destination</b> | BER        | BER        | Central    | South west | YRD        | North east | North west | YRD  |
|             | <b>mean</b>        | 0.40       | 0.63       | 0.26       | 0.55       | 0.25       | 0.34       | 0.21       | 0.19 |
|             | <b>Indicator</b>   | 0.84       | 1.00       | 0.99       | 1.00       | 0.99       | 0.85       | 0.85       | 0.96 |
|             | <b>BF</b>          | 9          | 3102       | 158        | 815        | 169        | 10         | 10         | 43   |
| <b>PB 1</b> | <b>Origin</b>      | YRD        | Central    | Central    | Central    | North west | PRD        | PRD        |      |
|             | <b>Destination</b> | BER        | North west | South west | YRD        | North east | South west | YRD        |      |
|             | <b>mean</b>        | 0.73       | 0.14       | 0.60       | 0.19       | 0.92       | 0.20       | 0.18       |      |
|             | <b>Indicator</b>   | 1.00       | 0.78       | 1.00       | 0.93       | 0.99       | 0.73       | 0.86       |      |
|             | <b>BF</b>          | 7758       | 6          | 1409       | 21         | 286        | 5          | 10         |      |
| <b>PA</b>   | <b>Origin</b>      | YRD        | Central    | Central    | Central    | North west | PRD        | PRD        |      |
|             | <b>Destination</b> | BER        | North west | South west | YRD        | North east | South west | YRD        |      |
|             | <b>mean</b>        | 1.17       | 0.20       | 0.61       | 0.23       | 0.84       | 0.26       | 0.21       |      |
|             | <b>Indicator</b>   | 1.00       | 0.86       | 1.00       | 0.81       | 0.96       | 0.80       | 0.91       |      |
|             | <b>BF</b>          | 1722       | 10         | 815        | 7          | 39         | 7          | 18         |      |
| <b>NP</b>   | <b>Origin</b>      | South west | YRD        | Central    | Central    | Central    | South west | PRD        |      |
|             | <b>Destination</b> | BER        | BER        | North west | South west | YRD        | North east | YRD        |      |
|             | <b>mean</b>        | 0.26       | 0.62       | 0.23       | 0.50       | 0.24       | 0.84       | 0.24       |      |
|             | <b>Indicator</b>   | 0.84       | 1.00       | 0.98       | 1.00       | 0.97       | 0.79       | 0.98       |      |
|             | <b>BF</b>          | 9          | 1938       | 76         | 774        | 50         | 7          | 76         |      |
| <b>M</b>    | <b>Origin</b>      | YRD        | PRD        | Central    |            |            |            |            |      |
|             | <b>Destination</b> | BER        | Central    | South west |            |            |            |            |      |
|             | <b>mean</b>        | 0.74       | 0.41       | 0.73       |            |            |            |            |      |
|             | <b>Indicator</b>   | 0.98       | 0.89       | 1.00       |            |            |            |            |      |
|             | <b>BF</b>          | 91         | 15         | 418        |            |            |            |            |      |
| <b>NS</b>   | <b>Origin</b>      | YRD        | Central    | PRD        | South west |            |            |            |      |
|             | <b>Destination</b> | BER        | South west | South west | YRD        |            |            |            |      |
|             | <b>mean</b>        | 0.66       | 0.91       | 0.39       | 0.83       |            |            |            |      |
|             | <b>Indicator</b>   | 0.75       | 0.99       | 0.94       | 0.84       |            |            |            |      |
|             | <b>BF</b>          | 5          | 121        | 26         | 9          |            |            |            |      |

States=7; only transitions with BF support > 5 are shown

**Table S8 Coefficients of predictors of spatial diffusion of Chinese AIV from GLM analysis**

| Predictor                  |             | Segment | TR                   |           |      | ED                  |           |      |
|----------------------------|-------------|---------|----------------------|-----------|------|---------------------|-----------|------|
|                            |             |         | Coefficient          | Indicator | BF   | Coefficient         | Indicator | BF   |
| Poultry population density | Overall     | PB2     | 0.94 (-2.88, 4.78)   | 0.75      | 4    | 2.23 (-0.88, 6.2)   | 0.75      | 4    |
|                            |             | PB1     | 0.75 (-3.29, 4.49)   | 0.74      | 3    | 0.8 (-2.28, 4.14)   | 0.69      | 3    |
|                            |             | PA      | 0.21 (-3.65, 3.96)   | 0.77      | 4    | 0.65 (-2.1, 4.42)   | 0.70      | 3    |
|                            |             | NP      | 0.21 (-3.65, 3.96)   | 0.77      | 4    | 0.71 (-2.28, 4.38)  | 0.69      | 3    |
|                            |             | M       | 0.4 (-3.58, 4.01)    | 0.75      | 4    | 0.5 (-2.66, 3.79)   | 0.68      | 3    |
|                            |             | NS      | 0.47 (-3.43, 4.38)   | 0.75      | 4    | 0.42 (-2.52, 3.99)  | 0.68      | 3    |
|                            | Origin      | PB2     | -1.09 (-4.08, 2.15)  | 0.76      | 4    | 0.89 (-1.19, 3.6)   | 0.76      | 4    |
|                            |             | PB1     | -1.27 (-4.18, 1.78)  | 0.79      | 5    | -0.19 (-2.27, 1.84) | 0.58      | 2    |
|                            |             | PA      | -2.44 (-4.96, 0.2)   | 0.95      | 24   | -0.35 (-2.71, 1.59) | 0.62      | 2    |
|                            |             | NP      | -2.44 (-4.96, 0.2)   | 0.95      | 24   | -0.24 (-2.74, 2.17) | 0.62      | 2    |
|                            |             | M       | -2.04 (-4.79, 0.6)   | 0.91      | 13   | -0.6 (-2.97, 0.99)  | 0.64      | 2    |
|                            |             | NS      | -1.85 (-4.62, 1.67)  | 0.88      | 9    | -0.66 (-3.14, 0.89) | 0.65      | 2    |
|                            | Destination | PB2     | 4.99 (2.88, 7.12)    | 1         | 6172 | 3.91 (1.7, 6.09)    | 1         | 6172 |
|                            |             | PB1     | 4.62 (2.28, 6.78)    | 1         | 3085 | 3.07 (0.91, 5.37)   | 0.99      | 122  |
|                            |             | PA      | 3.49 (1.27, 5.82)    | 0.9952    | 256  | 2.84 (0.66, 5.14)   | 0.98      | 60   |
|                            |             | NP      | 3.49 (1.27, 5.82)    | 1         | 256  | 2.42 (0, 4.4)       | 0.95      | 23   |
|                            |             | M       | 3.76 (1.26, 5.96)    | 0.99      | 236  | 3.34 (1.14, 5.53)   | 0.99      | 122  |
|                            |             | NS      | 4.01 (1.52, 6.62)    | 0.99      | 227  | 3.08 (0.6, 5.34)    | 0.98      | 60   |
| Farm product market        | Overall     | PB2     | 1.64 (-2.57, 5.72)   | 0.79      | 5    | 0.7 (-2.6, 4.45)    | 0.79      | 5    |
|                            |             | PB1     | 1.02 (-2.8, 5.32)    | 0.73      | 3    | 0.24 (-2.95, 3.83)  | 0.61      | 2    |
|                            |             | PA      | 0.41 (-3.45, 4.27)   | 0.71      | 3    | 0.11 (-3.22, 3.54)  | 0.67      | 3    |
|                            |             | NP      | 0.41 (-3.45, 4.27)   | 0.71      | 3    | 0.35 (-2.91, 3.87)  | 0.62      | 2    |
|                            |             | M       | 0.34 (-3.62, 4.31)   | 0.69      | 3    | 0.31 (-3.12, 3.76)  | 0.69      | 3    |
|                            |             | NS      | 0.22 (-3.63, 4.19)   | 0.7       | 3    | 0.01 (-3.61, 3.42)  | 0.70      | 3    |
|                            | Origin      | PB2     | -2.71 (-6.33, 1.24)  | 0.9       | 11   | -0.52 (-3.96, 2.46) | 0.9       | 11   |
|                            |             | PB1     | -3.57 (-6.86, 0.02)  | 0.96      | 27   | -0.68 (-3.95, 1.85) | 0.64      | 2    |
|                            |             | PA      | -4.88 (-7.97, -1.64) | 0.99      | 166  | -1.3 (-4.57, 1.5)   | 0.74      | 4    |
|                            |             | NP      | -4.88 (-7.97, -1.64) | 0.99      | 166  | -0.44 (-3.57, 2.1)  | 0.60      | 2    |
|                            |             | M       | -4.89 (-7.94, -1.83) | 0.99      | 195  | -1.16 (-4.5, 1.45)  | 0.74      | 4    |
|                            |             | NS      | -5.09 (-8.01, -2.13) | 1         | 293  | -2.06 (-5.52, 0.71) | 0.85      | 7    |



|                               |             |     |                      |      |      |                     |      |      |
|-------------------------------|-------------|-----|----------------------|------|------|---------------------|------|------|
|                               | Destination | PB2 | 7.63 ( 5.13, 10.21)  | 1    | 6172 | 2.42 (0, 5.41)      | 1    | 6172 |
|                               |             | PB1 | 6.88 ( 4.4, 9.57)    | 1    | 6172 | 1.27 (-0.82, 4.33)  | 0.72 | 3    |
|                               |             | PA  | 6.17 ( 3.65, 8.64)   | 1.00 | 6172 | 1.71 (-0.6, 4.69)   | 0.80 | 5    |
|                               |             | NP  | 6.17 ( 3.65, 8.64)   | 1    | 6172 | 1.22 (-0.9, 4.22)   | 0.70 | 3    |
|                               |             | M   | 6.08 ( 3.51, 8.63)   | 1    | 6172 | 2.33 (0, 5.27)      | 0.89 | 10   |
|                               |             | NS  | 5.93 ( 3.38, 8.6)    | 1    | 6172 | 2.28 (-0.13, 5.32)  | 0.88 | 9    |
| <b>Stock Volume of Forest</b> | Overall     | PB2 | 0.35 ( -3.38, 4.17)  | 0.7  | 3    | -0.13 (-3.11, 2.68) | 0.7  | 3    |
|                               |             | PB1 | -0.07 ( -3.98, 3.58) | 0.68 | 3    | 0.04 (-2.74, 3.13)  | 0.59 | 2    |
|                               |             | PA  | -0.46 ( -4.18, 3.32) | 0.71 | 3    | -0.37 (-3.56, 2.44) | 0.63 | 2    |
|                               |             | NP  | -0.46 ( -4.18, 3.32) | 0.71 | 3    | -0.07 (-2.99, 2.7)  | 0.59 | 2    |
|                               |             | M   | -0.12 ( -4.07, 3.57) | 0.69 | 3    | 0.05 (-2.43, 2.76)  | 0.41 | 1    |
|                               |             | NS  | -0.11 ( -4.11, 3.64) | 0.69 | 3    | 0.16 (-1.79, 2.9)   | 0.31 | 1    |
|                               | Origin      | PB2 | -0.04 ( -3.49, 3.36) | 0.67 | 3    | -0.57 (-2.83, 0.93) | 0.67 | 3    |
|                               |             | PB1 | -0.22 ( -3.75, 3.02) | 0.65 | 2    | -0.44 (-2.77, 1.06) | 0.56 | 2    |
|                               |             | PA  | -0.76 ( -4.05, 2.65) | 0.70 | 3    | -0.88 (-3.21, 0.81) | 0.69 | 3    |
|                               |             | NP  | -0.76 ( -4.05, 2.65) | 0.7  | 3    | -0.45 (-2.73, 0.99) | 0.57 | 2    |
|                               |             | M   | -0.26 ( -3.74, 3.11) | 0.64 | 2    | -0.4 (-2.75, 0.65)  | 0.43 | 1    |
|                               |             | NS  | -0.23 ( -3.57, 2.96) | 0.63 | 2    | -0.02 (-1.42, 1.06) | 0.23 | 0    |
|                               | Destination | PB2 | 0.48 ( -2.86, 3.44)  | 0.66 | 2    | 0.26 (-1.18, 2.18)  | 0.66 | 2    |
|                               |             | PB1 | 0.08 ( -3.24, 3.13)  | 0.62 | 2    | 0.41 (-0.98, 2.45)  | 0.56 | 2    |
|                               |             | PA  | 0.02 ( -3.17, 3.12)  | 0.62 | 2    | 0.16 (-1.46, 2.12)  | 0.57 | 2    |
|                               |             | NP  | 0.02 ( -3.17, 3.12)  | 0.62 | 2    | 0.29 (-1.19, 2.2)   | 0.54 | 1    |
|                               |             | M   | 0.06 ( -3.27, 3.16)  | 0.61 | 2    | 0.37 (-0.51, 2.38)  | 0.41 | 1    |
|                               |             | NS  | 0.01 ( -3.1, 3.32)   | 0.61 | 2    | 0.11 (-0.5, 1.59)   | 0.23 | 0    |
| <b>Nature Reserves</b>        | Overall     | PB2 | -0.17 ( -3.97, 3.56) | 0.63 | 2    | -0.22 (-3.49, 2.17) | 0.63 | 2    |
|                               |             | PB1 | -0.13 ( -3.82, 3.49) | 0.64 | 2    | 0.06 (-2.55, 3.06)  | 0.64 | 2    |
|                               |             | PA  | 0.07 ( -3.91, 3.74)  | 0.77 | 4    | 0.02 (-2.75, 2.8)   | 0.66 | 2    |
|                               |             | NP  | 0.07 ( -3.91, 3.74)  | 0.77 | 4    | 0.17 (-2.6, 3.16)   | 0.60 | 2    |
|                               |             | M   | 0.09 ( -3.88, 3.85)  | 0.74 | 4    | -0.1 (-3.2, 2.52)   | 0.62 | 2    |
|                               |             | NS  | 0.05 ( -3.84, 3.99)  | 0.7  | 3    | 0.29 (-2.43, 3.66)  | 0.63 | 2    |
|                               | Origin      | PB2 | 0.24 ( -3.33, 3.14)  | 0.51 | 1    | 0.34 (-0.94, 1.97)  | 0.51 | 1    |
|                               |             | PB1 | 0.28 ( -2.95, 3.52)  | 0.53 | 1    | 0.73 (-0.61, 2.2)   | 0.72 | 3    |
|                               |             | PA  | 0.82 ( -2.22, 3.11)  | 0.76 | 4    | 0.64 (-0.5, 2.19)   | 0.70 | 3    |
|                               |             | NP  | 0.82 ( -2.22, 3.11)  | 0.76 | 4    | 0.76 (-0.55, 2.35)  | 0.73 | 3    |

|                            |                                  |         |                      |                    |      |                     |                     |      |   |
|----------------------------|----------------------------------|---------|----------------------|--------------------|------|---------------------|---------------------|------|---|
|                            |                                  | M       | 0.81 (-2.25, 3.16)   | 0.73               | 3    | 0.49 (-0.67, 2.11)  | 0.60                | 2    |   |
|                            |                                  | NS      | 0.77 (-2.36, 3.18)   | 0.71               | 3    | 1.3 (-0.24, 2.92)   | 0.88                | 9    |   |
|                            | Destination                      | PB2     | -1.95 (-3.12, -0.63) | 0.98               | 69   | -1.08 (-2.4, 0.16)  | 0.98                | 69   |   |
|                            |                                  | PB1     | -1.85 (-2.95, -0.4)  | 0.98               | 56   | -0.68 (-2.15, 0.54) | 0.73                | 3    |   |
|                            |                                  | PA      | -1.39 (-3.06, 0.48)  | 0.92               | 13   | -0.76 (-2.17, 0.43) | 0.77                | 4    |   |
|                            |                                  | NP      | -1.39 (-3.06, 0.48)  | 0.92               | 13   | -0.57 (-2.04, 0.68) | 0.69                | 3    |   |
|                            |                                  | M       | -1.39 (-3.01, 0.84)  | 0.9                | 11   | -1.02 (-2.25, 0.42) | 0.84                | 6    |   |
|                            |                                  | NS      | -1.36 (-3.06, 1.25)  | 0.87               | 8    | -0.34 (-2.12, 1.1)  | 0.59                | 2    |   |
| <b>Average Temperature</b> | Overall                          | PB2     | 0.17 (-3.63, 4.06)   | 0.59               | 2    | -0.08 (-3.37, 3.23) | 0.59                | 2    |   |
|                            |                                  | PB1     | 0.11 (-3.83, 3.76)   | 0.58               | 2    | -0.49 (-3.03, 1.89) | 0.56                | 2    |   |
|                            |                                  | PA      | -0.08 (-4.12, 4.03)  | 0.75               | 4    | -0.6 (-3.4, 1.91)   | 0.67                | 3    |   |
|                            |                                  | NP      | 0 (-4.3, 4.04)       | 0.68               | 3    | -0.46 (-2.99, 1.98) | 0.64                | 2    |   |
|                            |                                  | M       | -0.02 (-3.72, 4.2)   | 0.67               | 3    | -0.13 (-2.86, 2.29) | 0.56                | 2    |   |
|                            |                                  | NS      | -0.06 (-3.87, 4.06)  | 0.68               | 3    | 0.32 (-2.07, 3.3)   | 0.59                | 2    |   |
|                            | Origin                           | PB2     | -0.34 (-3.17, 3.4)   | 0.51               | 1    | -1.59 (-3.25, 0)    | 0.88                | 9    |   |
|                            |                                  | PB1     | -0.41 (-3.47, 3.13)  | 0.53               | 1    | 0.1 (-1.15, 1.62)   | 0.94                | 19   |   |
|                            |                                  | PA      | -1.08 (-3.36, 1.65)  | 0.82               | 6    | 0.04 (-1.5, 1.57)   | 0.99                | 122  |   |
|                            |                                  | NP      | -0.9 (-3.73, 2.13)   | 0.72               | 3    | 0.11 (-1.24, 1.5)   | 0.98                | 60   |   |
|                            |                                  | M       | -0.79 (-3.27, 2.53)  | 0.7                | 3    | 0.35 (-0.79, 1.76)  | 0.7                 | 3    |   |
|                            |                                  | NS      | -1.02 (-3.79, 2.11)  | 0.75               | 4    | 0.86 (-0.44, 2.27)  | 0.79                | 5    |   |
|                            | Destination                      | PB2     | 3.4 (1.8, 4.8)       | 1                  | 6172 | 0.42 (-0.53, 2.22)  | 0.54                | 1    |   |
|                            |                                  | PB1     | 3.46 (1.83, 4.89)    | 1                  | 6172 | -0.34 (-1.63, 0.45) | 0.43                | 1    |   |
|                            |                                  | PA      | 2.55 (0.82, 4.25)    | 0.99               | 122  | -0.46 (-1.89, 0.46) | 0.58                | 2    |   |
|                            |                                  | NP      | 2.9 (0.95, 4.69)     | 0.99               | 122  | -0.34 (-1.65, 0.51) | 0.57                | 2    |   |
|                            |                                  | M       | 2.93 (1.19, 4.44)    | 1                  | 6172 | -0.51 (-1.73, 0.4)  | 0.6                 | 2    |   |
|                            |                                  | NS      | 2.88 (1.02, 4.6)     | 0.99               | 122  | -0.25 (-1.62, 0.98) | 0.55                | 2    |   |
|                            | <b>Average Relative Humidity</b> | Overall | PB2                  | 0.68 (-3.28, 4.59) | 0.74 | 4                   | -0.08 (-3.8, 3.34)  | 0.72 | 3 |
|                            |                                  |         | PB1                  | 0.45 (-3.5, 4.31)  | 0.75 | 4                   | -0.37 (-3.88, 2.37) | 0.7  | 3 |
|                            |                                  |         | PA                   | 0.05 (-3.74, 4.19) | 0.76 | 4                   | -0.88 (-4.54, 2.35) | 0.67 | 3 |
| NP                         |                                  |         | 0.4 (-3.59, 4.17)    | 0.76               | 4    | -0.81 (-4.84, 2.36) | 0.67                | 3    |   |
| M                          |                                  |         | 0.25 (-3.64, 4.3)    | 0.75               | 4    | -0.12 (-3.57, 2.92) | 0.69                | 3    |   |
| NS                         |                                  |         | 0.28 (-3.79, 4.03)   | 0.75               | 4    | -0.26 (-3.86, 2.78) | 0.71                | 3    |   |
| Origin                     |                                  | PB2     | -2.61 (-6.26, 1.28)  | 0.9                | 11   | -3.1 (-5.85, 0)     | 0.95                | 23   |   |
|                            |                                  | PB1     | -3.46 (-6.75, -0.25) | 0.95               | 23   | -1.88 (-3.42, 0)    | 0.96                | 30   |   |

|                                 |             |     |                      |      |      |                     |      |    |
|---------------------------------|-------------|-----|----------------------|------|------|---------------------|------|----|
|                                 |             | PA  | -4.04 (-7.35, -0.62) | 0.98 | 60   | -2.46 (-4.8, -0.55) | 0.98 | 60 |
|                                 |             | NP  | -3.34 (-6.93, -0.38) | 0.95 | 23   | -2.58 (-4.67, 0)    | 0.96 | 30 |
|                                 |             | M   | -3.48 (-7.09, 0.14)  | 0.96 | 30   | -0.79 (-2.5, 0.37)  | 0.86 | 8  |
|                                 |             | NS  | -3.96 (-7.3, -0.75)  | 0.98 | 60   | -0.99 (-2.77, 0.2)  | 0.94 | 19 |
|                                 | Destination | PB2 | 5.92 (2.81, 8.77)    | 1    | 6172 | 2.76 (0, 5.41)      | 0.93 | 16 |
|                                 |             | PB1 | 5.63 (2.7, 8.81)     | 1    | 6172 | 0.03 (-1.32, 1.65)  | 0.82 | 6  |
|                                 |             | PA  | 4.21 (1.22, 7.42)    | 0.99 | 122  | -0.51 (-2.57, 0.7)  | 0.7  | 3  |
|                                 |             | NP  | 5.13 (2.1, 8.19)     | 1    | 6172 | -0.56 (-2.85, 0.89) | 0.76 | 4  |
|                                 |             | M   | 4.73 (1.76, 7.81)    | 1    | 6172 | 0.46 (-0.53, 2.04)  | 0.96 | 30 |
|                                 |             | NS  | 5.1 (2.02, 8.05)     | 1    | 6172 | 0.25 (-1.05, 1.88)  | 0.88 | 9  |
| <b>Surface Water Resources</b>  | Overall     | PB2 | 0.27 (-3.33, 4.15)   | 0.76 | 4    | 0.3 (-2.94, 3.54)   | 0.76 | 4  |
|                                 |             | PB1 | 0.1 (-3.68, 4.07)    | 0.72 | 3    | 0.16 (-2.74, 3.26)  | 0.60 | 2  |
|                                 |             | PA  | -0.2 (-4.04, 3.72)   | 0.73 | 3    | -0.07 (-3.3, 3.19)  | 0.67 | 3  |
|                                 |             | NP  | -0.2 (-4.04, 3.72)   | 0.73 | 3    | 0.1 (-2.88, 3.69)   | 0.62 | 2  |
|                                 |             | M   | -0.21 (-4.17, 3.59)  | 0.73 | 3    | 0.27 (-2.52, 3.57)  | 0.58 | 2  |
|                                 |             | NS  | -0.33 (-4.28, 3.57)  | 0.73 | 3    | 0.2 (-3.18, 3.33)   | 0.64 | 2  |
|                                 | Origin      | PB2 | -1.31 (-4.13, 1.99)  | 0.83 | 6    | -0.67 (-3.12, 0.87) | 0.83 | 6  |
|                                 |             | PB1 | -1.5 (-4.58, 1.86)   | 0.82 | 6    | -0.57 (-2.74, 0.8)  | 0.61 | 2  |
|                                 |             | PA  | -2.63 (-5, -0.18)    | 0.97 | 38   | -1.46 (-3.65, 0.12) | 0.82 | 6  |
|                                 |             | NP  | -2.63 (-5, -0.18)    | 0.97 | 38   | -0.86 (-3.23, 0.67) | 0.68 | 3  |
|                                 |             | M   | -2.7 (-5.3, 0.04)    | 0.96 | 28   | -0.41 (-2.76, 0.91) | 0.53 | 1  |
|                                 |             | NS  | -3.06 (-5.71, -0.35) | 0.97 | 43   | -0.74 (-3.08, 0.83) | 0.64 | 2  |
|                                 | Destination | PB2 | 2.75 (0.57, 5)       | 0.98 | 68   | 2.16 (0, 3.79)      | 0.98 | 68 |
|                                 |             | PB1 | 2.28 (-0.31, 4.71)   | 0.93 | 17   | 1.28 (-0.15, 3.18)  | 0.82 | 6  |
|                                 |             | PA  | 1.41 (-1.55, 4.17)   | 0.84 | 7    | 1.34 (-0.26, 3.54)  | 0.80 | 5  |
|                                 |             | NP  | 1.41 (-1.55, 4.17)   | 0.84 | 7    | 1.66 (-0.03, 3.76)  | 0.86 | 8  |
|                                 |             | M   | 1.51 (-1.42, 4.37)   | 0.85 | 7    | 2.17 (0, 3.69)      | 0.94 | 19 |
|                                 |             | NS  | 1.45 (-1.79, 4.34)   | 0.83 | 6    | 2.13 (0, 3.85)      | 0.93 | 16 |
| <b>Human population density</b> | Overall     | PB2 | 1.34 (-2.76, 5.33)   | 0.77 | 4    | 1.2 (-1.69, 4.96)   | 0.77 | 4  |
|                                 |             | PB1 | 0.85 (-3.21, 4.67)   | 0.75 | 4    | 0.5 (-2.1, 3.64)    | 0.57 | 2  |
|                                 |             | PA  | 0.41 (-3.55, 4.05)   | 0.74 | 4    | 0.3 (-2.71, 3.46)   | 0.64 | 2  |
|                                 |             | NP  | 0.41 (-3.55, 4.05)   | 0.74 | 4    | 0.35 (-2.37, 3.69)  | 0.59 | 2  |
|                                 |             | M   | 0.3 (-3.58, 3.92)    | 0.74 | 3    | 0.19 (-2.93, 3.31)  | 0.59 | 2  |
|                                 |             | NS  | 0.2 (-3.59, 4.04)    | 0.74 | 3    | -0.1 (-3.46, 2.88)  | 0.61 | 2  |

|                                  |             |     |                       |      |      |                     |      |       |
|----------------------------------|-------------|-----|-----------------------|------|------|---------------------|------|-------|
|                                  | Origin      | PB2 | -0.07 (-3.09, 3.41)   | 0.66 | 2    | 0.38 (-1.62, 2.75)  | 0.66 | 2     |
|                                  |             | PB1 | -0.38 (-3.64, 2.81)   | 0.68 | 3    | -0.14 (-2.15, 1.57) | 0.49 | 1     |
|                                  |             | PA  | -1.34 (-4.38, 2.04)   | 0.81 | 5    | -0.52 (-2.89, 1.24) | 0.63 | 2     |
|                                  |             | NP  | -1.34 (-4.38, 2.04)   | 0.81 | 5    | -0.29 (-2.44, 1.52) | 0.55 | 2     |
|                                  |             | M   | -1.28 (-4.46, 2.08)   | 0.79 | 5    | -0.61 (-3.02, 1.05) | 0.61 | 2     |
|                                  |             | NS  | -1.45 (-4.98, 1.68)   | 0.81 | 5    | -1.29 (-3.56, 0.63) | 0.77 | 4     |
|                                  | Destination | PB2 | 3.84 ( 1.91, 5.62)    | 1    | 2056 | 1.79 (0, 3.69)      | 1    | 2056  |
|                                  |             | PB1 | 3.48 ( 1.39, 5.22)    | 1    | 513  | 0.86 (-0.25, 2.84)  | 0.67 | 3     |
|                                  |             | PA  | 3.15 ( 1.09, 5.06)    | 0.99 | 170  | 1.3 (-0.24, 3.15)   | 0.84 | 6     |
|                                  |             | NP  | 3.15 ( 1.09, 5.06)    | 0.99 | 170  | 0.82 (-0.41, 2.77)  | 0.68 | 3     |
|                                  |             | M   | 3.1 ( 0.91, 4.97)     | 0.99 | 126  | 1.25 (-0.25, 3.13)  | 0.80 | 5     |
|                                  |             | NS  | 2.82 ( 0.37, 5.02)    | 0.97 | 38   | 0.94 (-0.6, 3.07)   | 0.71 | 3     |
| <b>Freight by transportation</b> | Overall     | PB2 | 1.69 (-2.38, 5.89)    | 0.85 | 7    | 1.35 (-1.77, 5.46)  | 0.85 | 7     |
|                                  |             | PB1 | 1.12 (-2.93, 5.16)    | 0.81 | 5    | 0.88 (-2.55, 4.55)  | 0.74 | 4     |
|                                  |             | PA  | 0.58 (-3.52, 4.33)    | 0.77 | 4    | 0.54 (-2.86, 4.41)  | 0.77 | 4     |
|                                  |             | NP  | 0.58 (-3.52, 4.33)    | 0.77 | 4    | 0.63 (-2.73, 4.46)  | 0.75 | 4     |
|                                  |             | M   | 0.51 (-3.43, 4.39)    | 0.76 | 4    | 0.73 (-2.62, 4.43)  | 0.76 | 4     |
|                                  |             | NS  | 0.35 (-3.76, 4.26)    | 0.75 | 4    | 0.62 (-2.88, 4.23)  | 0.75 | 4     |
|                                  | Origin      | PB2 | -4.71 (-8.32, -1.12)  | 0.99 | 92   | -1.54 (-4.83, 1.2)  | 0.99 | 92    |
|                                  |             | PB1 | -5.59 (-8.94, -2.27)  | 1    | 342  | -1.93 (-5.37, 0.68) | 0.82 | 6     |
|                                  |             | PA  | -6.2 (-9.77, -2.75)   | 1    | 424  | -2.97 (-6.18, 0)    | 0.93 | 16    |
|                                  |             | NP  | -6.2 (-9.77, -2.75)   | 1    | 424  | -2.43 (-5.97, 0.3)  | 0.87 | 8     |
|                                  |             | M   | -6.45 (-9.78, -3.17)  | 1    | 1542 | -3.51 (-6.49, 0)    | 0.96 | 30    |
|                                  |             | NS  | -7.03 (-10.31, -4.03) | 1    | 6172 | -3.45 (-6.44, 0)    | 0.96 | 30    |
|                                  | Destination | PB2 | 8.94 ( 6.03, 11.81)   | 1    | 6172 | 5.79 (2.57, 9.17)   | 1    | 12344 |
|                                  |             | PB1 | 8.61 ( 5.62, 11.43)   | 1    | 6172 | 4.99 (1.53, 8.69)   | 0.99 | 122   |
|                                  |             | PA  | 7.74 ( 4.8, 10.47)    | 1    | 6172 | 4.86 (1.57, 8.57)   | 0.99 | 122   |
|                                  |             | NP  | 7.74 ( 4.8, 10.47)    | 1    | 6172 | 4.62 (0.96, 8.36)   | 0.99 | 122   |
|                                  |             | M   | 7.87 ( 5, 10.76)      | 1    | 6172 | 5.72 (2.6, 9.02)    | 0.99 | 6172  |
|                                  |             | NS  | 8 ( 4.97, 10.86)      | 1    | 6172 | 5.3 (1.9, 8.52)     | 1.00 | 6172  |
| <b>Sample size</b>               | Overall     | PB2 | 0.26 (-3.23, 4.12)    | 0.52 | 1    | 0.22 (-2.46, 3.14)  | 0.52 | 1     |
|                                  |             | PB1 | 0.21 (-3.36, 4.05)    | 0.49 | 1    | 0 (-2.93, 3.1)      | 0.50 | 1     |
|                                  |             | PA  | -0.07 (-3.88, 3.83)   | 0.69 | 3    | -0.03 (-3.3, 3.62)  | 0.61 | 2     |
|                                  |             | NP  | -0.07 (-3.88, 3.83)   | 0.69 | 3    | -0.09 (-3.53, 3.45) | 0.59 | 2     |

|             |     |                      |      |      |                     |      |      |
|-------------|-----|----------------------|------|------|---------------------|------|------|
|             | M   | -0.03 ( -3.96, 3.76) | 0.64 | 2    | 0.05 (-3.17, 2.86)  | 0.51 | 1    |
|             | NS  | 0.05 ( -3.65, 4.09)  | 0.63 | 2    | -0.07 (-3.32, 3.26) | 0.56 | 2    |
| Origin      | PB2 | -0.31 ( -3.32, 3.57) | 0.46 | 1    | -0.24 (-2, 0.91)    | 0.46 | 1    |
|             | PB1 | -0.36 ( -3.47, 3.23) | 0.46 | 1    | -0.46 (-2.6, 0.46)  | 0.48 | 1    |
|             | PA  | -1.31 ( -3.89, 1.54) | 0.84 | 6    | -1.23 (-3.35, 0.04) | 0.75 | 4    |
|             | NP  | -1.31 ( -3.89, 1.54) | 0.84 | 6    | -1.18 (-3.43, 0.11) | 0.71 | 3    |
|             | M   | -1.14 ( -3.75, 2.17) | 0.78 | 4    | -0.45 (-2.47, 0.55) | 0.48 | 1    |
|             | NS  | -1.07 ( -4.02, 2.31) | 0.71 | 3    | -0.82 (-3.14, 0.22) | 0.61 | 2    |
| Destination | PB2 | 3.65 ( 2, 4.88)      | 1    | 1028 | 2.86 (1.4, 4.24)    | 1    | 1028 |
|             | PB1 | 3.56 ( 1.94, 4.76)   | 1    | 1121 | 2.55 (0.65, 4.03)   | 0.98 | 60   |
|             | PA  | 0.13 ( 0, 2.92)      | 0.84 | 70   | 1.77 (0, 3.5)       | 0.87 | 8    |
|             | NP  | 2.62 ( 0, 4.43)      | 0.98 | 70   | 1.84 (0, 3.54)      | 0.88 | 9    |
|             | M   | 2.69 ( 0.81, 4.34)   | 0.98 | 68   | 2.82 (0.97, 4.2)    | 0.99 | 122  |
|             | NS  | 2.82 ( 0.79, 4.6)    | 0.98 | 56   | 2.26 (0, 3.59)      | 0.94 | 19   |

|                               |             |     |                      |      |   |                      |      |   |
|-------------------------------|-------------|-----|----------------------|------|---|----------------------|------|---|
| <b>Proportion of domestic</b> | Overall     | PB2 | -0.14 (-3.19, 3.4 )  | 0.61 | 2 | 0.02 (-3.76, 4.02 )  | 0.12 | 0 |
|                               |             | PB1 | -0.13 (-3.4, 3.16)   | 0.63 | 2 | -0.09 (-3.97, 3.81 ) | 0.15 | 0 |
|                               |             | PA  | -0.09 (-3.53, 3.19 ) | 0.63 | 2 | 0 (-3.67, 3.99 )     | 0.13 | 0 |
|                               |             | NP  | 0.15 (-3.61, 3.77 )  | 0.63 | 2 | -0.01 (-3.84, 4.12 ) | 0.21 | 0 |
|                               |             | M   | -0.03 (-3.52, 3.34 ) | 0.62 | 2 | -0.01 (-3.75, 4.02 ) | 0.10 | 0 |
|                               |             | NS  | 0.3 (-3.28, 3.95 )   | 0.63 | 2 | 0.13 (-3.62, 4.08 )  | 0.15 | 0 |
|                               | Origin      | PB2 | 0.66 (-2.88, 3.59 )  | 0.68 | 3 | 0.04 (-3.83, 3.9 )   | 0.09 | 0 |
|                               |             | PB1 | 0.94 (-2.35, 3.93 )  | 0.73 | 3 | 0.13 (-3.97, 3.66 )  | 0.12 | 0 |
|                               |             | PA  | 0.83 (-2.59, 3.73 )  | 0.72 | 3 | 0.07 (-3.87, 3.73 )  | 0.10 | 0 |
|                               |             | NP  | 1.22 (-2.75, 4.23 )  | 0.78 | 4 | 0.2 (-3.77, 3.66 )   | 0.19 | 0 |
|                               |             | M   | 0.88 (-2.37, 3.98 )  | 0.72 | 3 | 0.03 (-3.97, 3.74 )  | 0.07 | 0 |
|                               |             | NS  | 1.38 (-2.09, 4.24 )  | 0.81 | 5 | 0.01 (-3.85, 3.8 )   | 0.06 | 0 |
|                               | Destination | PB2 | -0.87 (-3.37, 2.69 ) | 0.73 | 3 | 0.03 (-3.97, 3.66 )  | 0.09 | 0 |
|                               |             | PB1 | -1.16 (-3.73, 2.13 ) | 0.81 | 5 | 0.1 (-3.92, 3.77 )   | 0.14 | 0 |
|                               |             | PA  | -1.12 (-3.66, 1.95 ) | 0.81 | 5 | 0.06 (-3.76, 3.9 )   | 0.10 | 0 |
|                               |             | NP  | -0.88 (-3.64, 2.61 ) | 0.78 | 4 | 0.12 (-3.76, 3.72 )  | 0.19 | 0 |

|                                           |             |     |                      |      |   |                      |      |   |
|-------------------------------------------|-------------|-----|----------------------|------|---|----------------------|------|---|
|                                           |             | M   | -1.21 (-3.74, 2.01 ) | 0.81 | 5 | -0.02 (-3.92, 3.87 ) | 0.07 | 0 |
|                                           |             | NS  | -0.9 (-3.61, 2.49 )  | 0.76 | 4 | 0.01 (-3.89, 3.79 )  | 0.05 | 0 |
| <b>Proportion of domestic galliformes</b> | Overall     | PB2 | 0.41 (-2.95, 3.86 )  | 0.61 | 2 | 0.33 (-3.32, 3.7 )   | 0.42 | 1 |
|                                           |             | PB1 | 0.69 (-3.08, 4.07 )  | 0.67 | 2 | 0.03 (-3.6, 3.74 )   | 0.29 | 1 |
|                                           |             | PA  | 0.29 (-3.25, 3.53 )  | 0.64 | 2 | 0.07 (-3.67, 3.66 )  | 0.29 | 1 |
|                                           |             | NP  | 0.87 (-2.55, 4.45 )  | 0.73 | 3 | 0.37 (-3.5, 3.59 )   | 0.50 | 2 |
|                                           |             | M   | 0.6 (-3, 4.04 )      | 0.67 | 2 | 0.16 (-3.64, 3.63 )  | 0.34 | 1 |
|                                           |             | NS  | 0.71 (-2.99, 4.19 )  | 0.67 | 2 | 0.05 (-3.52, 3.75 )  | 0.30 | 1 |
|                                           | Origin      | PB2 | -0.26 (-3.19, 3.11 ) | 0.60 | 2 | 0.08 (-3.65, 3.72 )  | 0.24 | 1 |
|                                           |             | PB1 | -0.21 (-3.04, 3.04 ) | 0.64 | 2 | 0.13 (-3.7, 3.62 )   | 0.23 | 1 |
|                                           |             | PA  | -0.35 (-3.3, 2.77 )  | 0.65 | 2 | 0.07 (-3.76, 3.82 )  | 0.22 | 0 |
|                                           |             | NP  | -0.03 (-2.9, 3.08 )  | 0.68 | 3 | 0.2 (-3.53, 3.45 )   | 0.36 | 1 |
|                                           |             | M   | -0.14 (-3.09, 2.98 ) | 0.65 | 2 | 0.09 (-3.75, 3.52 )  | 0.25 | 1 |
|                                           |             | NS  | -0.1 (-2.94, 3.19 )  | 0.67 | 2 | -0.03 (-3.92, 3.55 ) | 0.22 | 0 |
|                                           | Destination | PB2 | 0.8 (-2.15, 3.49 )   | 0.74 | 4 | 0.07 (-3.72, 3.57 )  | 0.25 | 1 |
|                                           |             | PB1 | 1.27 (-1.18, 3.84 )  | 0.87 | 8 | 0.01 (-3.89, 3.53 )  | 0.21 | 0 |
|                                           |             | PA  | 0.59 (-2.59, 3.29 )  | 0.68 | 3 | 0.07 (-3.63, 3.78 )  | 0.20 | 0 |
|                                           |             | NP  | 1.14 (-1.63, 3.58 )  | 0.85 | 7 | 0.07 (-3.63, 3.46 )  | 0.30 | 1 |
|                                           |             | M   | 0.83 (-2.35, 3.39 )  | 0.76 | 4 | 0.06 (-3.7, 3.62 )   | 0.23 | 1 |
|                                           |             | NS  | 1.12 (-1.65, 3.63 )  | 0.85 | 7 | 0.02 (-3.84, 3.64 )  | 0.20 | 0 |

For predictors, their correlations to the AIV diffusion in two region types (TR, ED) were summarized and the columns represented six internal segments.

<sup>a</sup>: IP is the abbreviation of the inclusion probabilities, ranging between 0 to 1, representing the less precise values by showing only 2 decimal places.

<sup>b</sup>: the Bayes Factor estimates for the inclusion probabilities with BF>3 indicating a statistical significant (in bold).

<sup>c</sup>: the correlation Coefficient with mean and 95% HPD interval. The mean and intervals above 0 indicates a positive correlation (in red), while the value below 0 indicates a negative correlation (in blue).

**Table S9 Sequence information and Accession numbers of 6 internal segments of AIV in this study**

| Strain Name                      | Accession No. |          |          |          |          |          | Subtype | Host         |          | Provinces |
|----------------------------------|---------------|----------|----------|----------|----------|----------|---------|--------------|----------|-----------|
|                                  | PB2           | PB1      | PA       | NP       | M        | NS       |         | Order        | Type     |           |
| A/chicken/Henan/26/00            | DQ064557      | DQ064530 | DQ064503 | DQ064449 | DQ064395 | DQ064476 | H9N2    | Galliformes  | Domestic | Henan     |
| A/duck/Shantou/1275/2004         | HM145575      | HM145406 | HM145237 | HM145068 | HM144731 | HM144899 | H6N1    | Anseriformes | Domestic | Guangdong |
| A/wild duck/Shantou/867/2002     | HM145625      | HM145456 | HM145287 | HM145118 | HM144780 | HM144949 | H6N2    | Anseriformes | Wild     | Guangdong |
| A/little grebe/Xianghai/429/2011 | JX570859      | JX570858 | JX570857 | JX570862 | JX570860 | JX570861 | H5N2    | Anseriformes | Wild     | Jilin     |
| A/duck/Guangxi/2281/2007         | CY109623      | CY109624 | CY109625 | CY109627 | CY109629 | CY109630 | H6N6    | Anseriformes | Domestic | Guangxi   |
| A/duck/Guangxi/GXd-1/2009        | JX293566      | JX293565 | JX293564 | JX293562 | JX293560 | JX293563 | H6N5    | Anseriformes | Domestic | Guangxi   |
| A/duck/Guangxi/GXd-7/2011        | JX304777      | JX304776 | JX304775 | JX304773 | JX304771 | JX304774 | H6N6    | Anseriformes | Domestic | Guangxi   |
| A/duck/Fujian/378/2007           | CY109775      | CY109776 | CY109777 | CY109779 | CY109781 | CY109782 | H6N6    | Anseriformes | Domestic | Fujian    |
| A/duck/Guangxi/3574/2006         | CY109271      | CY109272 | CY109273 | CY109275 | CY109277 | CY109278 | H6N2    | Anseriformes | Domestic | Guangxi   |
| A/wild duck/Shantou/5769/2004    | HM145668      | HM145499 | HM145330 | HM145161 | HM144823 | HM144992 | H6N2    | Anseriformes | Wild     | Guangdong |
| A/wild duck/Shantou/865/2002     | HM145624      | HM145455 | HM145286 | HM145117 | HM144779 | HM144948 | H6N2    | Anseriformes | Wild     | Guangdong |
| A/duck/Fujian/2018/2007          | CY109807      | CY109808 | CY109809 | CY109811 | CY109813 | CY109814 | H6N6    | Anseriformes | Domestic | Fujian    |
| A/wild duck/Shantou/311/2001     | HM145740      | HM145571 | HM145402 | HM145233 | HM144895 | HM145064 | H6N9    | Anseriformes | Wild     | Guangdong |
| A/duck/Fujian/5813/2007          | CY110529      | CY110530 | CY110531 | CY110533 | CY110535 | CY110536 | H6N6    | Anseriformes | Domestic | Fujian    |
| A/duck/Shantou/10776/2006        | CY109439      | CY109440 | CY109441 | CY109443 | CY109445 | CY109446 | H6N2    | Anseriformes | Domestic | Guangdong |
| A/duck/Fujian/331/2007           | CY110653      | CY110654 | CY110655 | CY110657 | CY110659 | CY110660 | H6N6    | Anseriformes | Domestic | Fujian    |
| A/duck/Fujian/958/2006           | CY109487      | CY109488 | CY109489 | CY109491 | CY109493 | CY109494 | H6N6    | Anseriformes | Domestic | Fujian    |
| A/duck/Fujian/11339/2005         | HM145714      | HM145545 | HM145376 | HM145207 | HM144869 | HM145038 | H6N2    | Anseriformes | Domestic | Fujian    |
| A/duck/Fujian/8807/2006          | CY110635      | CY110636 | CY110637 | CY110639 | CY110641 | CY110642 | H6N6    | Anseriformes | Domestic | Fujian    |
| A/duck/Shantou/7568/2005         | HM145683      | HM145514 | HM145345 | HM145176 | HM144838 | HM145007 | H6N2    | Anseriformes | Domestic | Guangdong |
| A/duck/Hunan/S1661/2012          | CY146617      | CY146618 | CY146619 | CY146621 | CY146623 | CY146624 | H6N6    | Anseriformes | Domestic | Hunan     |
| A/duck/Hubei/5/2010              | CY110970      | CY110971 | CY110972 | CY110974 | CY110976 | CY110977 | H6N6    | Anseriformes | Domestic | Hubei     |
| A/duck/Hunan/4056/2006           | CY109319      | CY109320 | CY109321 | CY109323 | CY109325 | CY109326 | H6N8    | Anseriformes | Domestic | Hunan     |
| A/duck/Shantou/1080/2007         | CY109743      | CY109744 | CY109745 | CY109747 | CY109749 | CY109750 | H6N2    | Anseriformes | Domestic | Guangdong |
| A/duck/Shantou/14841/2006        | CY109447      | CY109448 | CY109449 | CY109451 | CY109453 | CY109454 | H6N6    | Anseriformes | Domestic | Guangdong |
| A/duck/Shantou/5808/2005         | HM145681      | HM145512 | HM145343 | HM145174 | HM144836 | HM145005 | H6N2    | Anseriformes | Domestic | Guangdong |

|                                   |          |          |          |          |          |          |       |              |          |           |
|-----------------------------------|----------|----------|----------|----------|----------|----------|-------|--------------|----------|-----------|
| A/duck/Shantou/2472/2005          | HM145677 | HM145508 | HM145339 | HM145170 | HM144832 | HM145001 | H6N2  | Anseriformes | Domestic | Guangdong |
| A/wild duck/Shantou/9466/2006     | CY109431 | CY109432 | CY109433 | CY109435 | CY109437 | CY109438 | H6N6  | Anseriformes | Wild     | Guangdong |
| A/duck/Shantou/9689/2006          | CY110331 | CY110332 | CY110333 | CY110335 | CY110337 | CY110338 | H6N2  | Anseriformes | Domestic | Guangdong |
| A/duck/Shantou/9395/2006          | CY110315 | CY110316 | CY110317 | CY110319 | CY110321 | CY110322 | H6N2  | Anseriformes | Domestic | Guangdong |
| A/duck/Guangdong/W12/2011         | JX175250 | JX175251 | JX175252 | JX175254 | JX175256 | JX175257 | H3N2  | Anseriformes | Domestic | Guangdong |
| A/duck/Hebei/0908/2009            | JQ041387 | JQ041391 | JQ041395 | JQ041403 | JQ041411 | JQ041415 | H5N2  | Anseriformes | Domestic | Hebei     |
| A/duck/Guangdong/E1/2012          | JQ924790 | JQ924791 | JQ924792 | JQ924789 | JQ924788 | JQ924793 | H10N8 | Anseriformes | Domestic | Guangdong |
| A/chicken/Jiangsu/1001/2013       | KF150631 | KF150632 | KF150633 | KF150635 | KF150637 | KF150638 | H5N2  | Galliformes  | Domestic | Jiangsu   |
| A/chicken/Guangdong/LG1/2013      | KC951119 | KC951120 | KC951121 | KC951123 | KC951125 | KC951126 | H9N2  | Galliformes  | Domestic | Guangdong |
| A/chicken/Rizhao/1339/2013        | KF260950 | KF260706 | KF260462 | KF259974 | KF259455 | KF260218 | H9N2  | Galliformes  | Domestic | Shandong  |
| A/silkie chicken/Wenzhou/812/2013 | KF260936 | KF260692 | KF260448 | KF259960 | KF259441 | KF260204 | H9N2  | Galliformes  | Domestic | Zhejiang  |
| A/chicken/Rizhao/55/2013          | KF260941 | KF260697 | KF260453 | KF259965 | KF259446 | KF260209 | H9N2  | Galliformes  | Domestic | Shandong  |
| A/pigeon/Shanghai/JC1/2013        | KJ128369 | KJ128368 | KJ128367 | KJ128365 | KJ128363 | KJ128366 | H9N2  | Passerine    | Wild     | Shanghai  |
| A/chicken/Wenzhou/253/2013        | KF260932 | KF260688 | KF260444 | KF259956 | KF259437 | KF260200 | H9N2  | Galliformes  | Domestic | Zhejiang  |
| A/chicken/Shanghai/020/2013       | KF500984 | KF500983 | KF500982 | KF500980 | KF500978 | KF500981 | H9N2  | Galliformes  | Domestic | Shanghai  |
| A/chicken/Guangdong/ZHJ/2011      | JN869535 | JN869536 | JN869537 | JN869539 | JN869541 | JN869542 | H9N2  | Galliformes  | Domestic | Guangdong |
| A/chicken/Zhejiang/607/2011       | JQ356885 | JQ356888 | JQ356882 | JQ356879 | JQ356891 | JQ356894 | H9N2  | Galliformes  | Domestic | Zhejiang  |
| A/chicken/Wenzhou/89/2013         | KF260902 | KF260658 | KF260414 | KF259926 | KF259407 | KF260170 | H7N7  | Galliformes  | Domestic | Zhejiang  |
| A/chicken/Shandong/03/2010        | JF795067 | JF795068 | JF795069 | JF795071 | JF795073 | JF795074 | H9N2  | Galliformes  | Domestic | Shandong  |
| A/duck/Shanghai/C163/2009         | KC768061 | KC768058 | KC768055 | KC768049 | KC768043 | KC768052 | H9N2  | Anseriformes | Domestic | Shanghai  |
| A/chicken/Shandong/H/2009         | JF795091 | JF795092 | JF795093 | JF795095 | JF795097 | JF795098 | H9N2  | Galliformes  | Domestic | Shandong  |
| A/chicken/Shandong/02/2010        | JF795059 | JF795060 | JF795061 | JF795063 | JF795065 | JF795066 | H9N2  | Galliformes  | Domestic | Shandong  |
| A/chicken/Hunan/12/2011           | KF714780 | KF714781 | KF714782 | KF714784 | KF714786 | KF714787 | H9N2  | Galliformes  | Domestic | Hunan     |
| A/chicken/Jiangsu/Q3/2010         | JN869528 | JN869529 | JN869530 | JN869531 | JN869533 | JN869534 | H9N2  | Galliformes  | Domestic | Jiangsu   |
| A/chicken/Shanghai/S1080/2013     | CY147001 | CY147002 | CY147003 | CY147005 | CY147007 | CY147008 | H7N9  | Galliformes  | Domestic | Shanghai  |
| A/brambling/Beijing/16/2012       | KC464595 | KC464596 | KC464597 | KC464599 | KC464601 | KC464602 | H9N2  | Passerine    | Wild     | Beijing   |
| A/chicken/Shanghai/017/2013       | KF542890 | KF542888 | KF542886 | KF542882 | KF542878 | KF542884 | H7N9  | Galliformes  | Domestic | Shanghai  |
| A/chicken/Zhejiang/SD007/2013     | CY147033 | CY147034 | CY147035 | CY147037 | CY147039 | CY147040 | H7N9  | Galliformes  | Domestic | Zhejiang  |
| A/chicken/Hunan/1/2012            | KF714772 | KF714773 | KF714774 | KF714776 | KF714778 | KF714779 | H9N2  | Galliformes  | Domestic | Hunan     |
| A/chicken/Zhejiang/611/2011       | JQ356886 | JQ356889 | JQ356883 | JQ356880 | JQ356892 | JQ356895 | H9N2  | Galliformes  | Domestic | Zhejiang  |



|                                      |          |          |          |          |          |          |       |              |          |          |
|--------------------------------------|----------|----------|----------|----------|----------|----------|-------|--------------|----------|----------|
| A/chicken/Shandong/01/2009           | JF795141 | JF795142 | JF795143 | JF795145 | JF795147 | JF795148 | H9N2  | Galliformes  | Domestic | Shandong |
| A/chicken/Tibet/S1/2009              | CY087168 | CY087169 | CY087170 | CY087172 | CY087174 | CY087175 | H9N2  | Galliformes  | Domestic | Tibet    |
| A/spot-billed duck/Xianghai/427/2011 | JX570843 | JX570842 | JX570841 | JX570846 | JX570844 | JX570845 | H5N2  | Anseriformes | Wild     | Jilin    |
| A/baikal teal/Xianghai/426/2011      | JX570835 | JX570834 | JX570833 | JX570838 | JX570836 | JX570837 | H5N2  | Anseriformes | Wild     | Jilin    |
| A/duck/Jiangxi/23005/2009            | KF260738 | KF260494 | KF260250 | KF259762 | KF259243 | KF260006 | H7N3  | Anseriformes | Domestic | Jiangxi  |
| A/duck/Jiangxi/8028/2009             | KF260729 | KF260485 | KF260241 | KF259753 | KF259234 | KF259997 | H7N3  | Anseriformes | Domestic | Jiangxi  |
| A/chicken/Zhejiang/HJ/2007           | FJ581429 | FJ581435 | FJ581430 | FJ581428 | FJ581432 | FJ581433 | H9N2  | Galliformes  | Domestic | Zhejiang |
| A/duck/Hunan/2110/2006               | CY109311 | CY109312 | CY109313 | CY109315 | CY109317 | CY109318 | H6N2  | Anseriformes | Domestic | Hunan    |
| A/duck/Guangxi/2736/2006             | CY109255 | CY109256 | CY109257 | CY109259 | CY109261 | CY109262 | H6N8  | Anseriformes | Domestic | Guangxi  |
| A/duck/Guangxi/1533/2007             | CY109615 | CY109616 | CY109617 | CY109619 | CY109621 | CY109622 | H6N2  | Anseriformes | Domestic | Guangxi  |
| A/mallard/Jiangxi/7787/2003          | HM145574 | HM145405 | HM145236 | HM145067 | HM144730 | HM144898 | H6N1  | Anseriformes | Wild     | Jiangxi  |
| A/duck/Guangxi/141/2005              | HM145694 | HM145525 | HM145356 | HM145187 | HM144849 | HM145018 | H6N2  | Anseriformes | Domestic | Guangxi  |
| A/duck/Guangxi/3459/2005             | HM145696 | HM145527 | HM145358 | HM145189 | HM144851 | HM145020 | H6N2  | Anseriformes | Domestic | Guangxi  |
| A/duck/Guangxi/1455/2004             | HM145717 | HM145548 | HM145379 | HM145210 | HM144872 | HM145041 | H6N5  | Anseriformes | Domestic | Guangxi  |
| A/chicken/Fujian/G9/2009             | JN869514 | JN869515 | JN869516 | JN869517 | JN869519 | JN869520 | H9N2  | Galliformes  | Domestic | Fujian   |
| A/sparrow/Guangxi/GXs-1/2012         | KF013901 | KF013908 | KF013907 | KF013905 | KF013903 | KF013906 | H1N2  | Passerine    | Wild     | Guangxi  |
| A/duck/Hunan/S11313/2012             | CY146569 | CY146570 | CY146571 | CY146573 | CY146575 | CY146576 | H4N2  | Anseriformes | Domestic | Hunan    |
| A/duck/Guizhou/1078/2011             | KF260748 | KF260504 | KF260260 | KF259772 | KF259253 | KF260016 | H11N9 | Anseriformes | Domestic | Guizhou  |
| A/duck/Jiangxi/21980/2010            | KF260747 | KF260503 | KF260259 | KF259771 | KF259252 | KF260015 | H7N7  | Anseriformes | Domestic | Jiangxi  |
| A/duck/Hunan/S1256/2012              | CY146601 | CY146602 | CY146603 | CY146605 | CY146607 | CY146608 | H3N8  | Anseriformes | Domestic | Hunan    |
| A/wild goose/Dongting/C1037/2011     | KC876688 | KC876689 | KC876690 | KC876692 | KC876694 | KC876695 | H12N8 | Anseriformes | Wild     | Hunan    |
| A/wild waterfowl/Dongting/C2383/2012 | KF874478 | KF874479 | KF874480 | KF874482 | KF874484 | KF874485 | H1N2  | Anseriformes | Wild     | Hunan    |
| A/wild duck/Jiangxi/8462/2006        | CY109335 | CY109336 | CY109337 | CY109339 | CY109341 | CY109342 | H6N1  | Anseriformes | Wild     | Jiangxi  |
| A/canvasback/Xianghai/428/2011       | JX570851 | JX570850 | JX570849 | JX570854 | JX570852 | JX570853 | H5N2  | Anseriformes | Wild     | Jilin    |
| A/duck/Shanghai/C84/2009             | JX286598 | JX286597 | JX286596 | JX286594 | JX286592 | JX286595 | H3N2  | Anseriformes | Domestic | Shanghai |
| A/chicken/Hubei/2856/2007            | FJ784835 | FJ784819 | FJ784803 | FJ784787 | FJ784883 | FJ784867 | H5N1  | Galliformes  | Domestic | Hubei    |
| A/chicken/Hunan/3157/2006            | FJ784838 | FJ784822 | FJ784806 | FJ784790 | FJ784886 | FJ784870 | H5N1  | Galliformes  | Domestic | Hunan    |
| A/duck/Hubei/2911/2007               | FJ784836 | FJ784820 | FJ784804 | FJ784788 | FJ784884 | FJ784868 | H5N1  | Anseriformes | Domestic | Hubei    |
| A/duck/Hunan/1590/2007               | CY109679 | CY109680 | CY109681 | CY109683 | CY109685 | CY109686 | H6N9  | Anseriformes | Domestic | Hunan    |
| A/wild duck/Jiangxi/9157/2005        | KF260785 | KF260541 | KF260297 | KF259809 | KF259290 | KF260053 | H7N8  | Anseriformes | Wild     | Jiangxi  |

|                                       |          |          |          |          |          |          |      |              |          |           |
|---------------------------------------|----------|----------|----------|----------|----------|----------|------|--------------|----------|-----------|
| A/wild duck/Jiangxi/10179/2005        | KF260786 | KF260542 | KF260298 | KF259810 | KF259291 | KF260054 | H7N3 | Anseriformes | Wild     | Jiangxi   |
| A/duck/Hunan/S1824/2012               | CY146625 | CY146626 | CY146627 | CY146629 | CY146631 | CY146632 | H3N8 | Anseriformes | Domestic | Hunan     |
| A/duck/Hunan/3748/2004                | HM145737 | HM145568 | HM145399 | HM145230 | HM144892 | HM145061 | H6N8 | Anseriformes | Domestic | Hunan     |
| A/duck/Guizhou/2492/2007              | CY109655 | CY109656 | CY109657 | CY109659 | CY109661 | CY109662 | H6N1 | Anseriformes | Domestic | Guizhou   |
| A/duck/Jiangsu/26/2004                | KC261666 | KC261667 | KC261668 | KC261670 | KC261672 | KC261673 | H3N2 | Anseriformes | Domestic | Jiangsu   |
| A/mallard/Jiangxi/12147/2005          | HM145700 | HM145531 | HM145362 | HM145193 | HM144855 | HM145024 | H6N2 | Anseriformes | Wild     | Jiangxi   |
| A/duck/Guizhou/888/2006               | CY109279 | CY109280 | CY109281 | CY109283 | CY109285 | CY109286 | H6N5 | Anseriformes | Domestic | Guizhou   |
| A/duck/Guizhou/1084/2006              | CY109287 | CY109288 | CY109289 | CY109291 | CY109293 | CY109294 | H6N2 | Anseriformes | Domestic | Guizhou   |
| A/duck/Shanghai/Y20/2006              | CY111603 | CY111604 | CY111605 | CY111607 | CY111609 | CY111610 | H4N6 | Anseriformes | Domestic | Shanghai  |
| A/garganey/SanJiang/160/2006          | EF634329 | EF634330 | EF634331 | EF634333 | EF634335 | EF634336 | H5N2 | Anseriformes | Wild     | Guangxi   |
| A/green-winged teal/Xianghai/430/2011 | JX570867 | JX570866 | JX570865 | JX570870 | JX570868 | JX570869 | H5N2 | Anseriformes | Wild     | Jilin     |
| A/wild goose/Dongting/PC0360/2012     | KC876680 | KC876681 | KC876682 | KC876684 | KC876686 | KC876687 | H7N7 | Anseriformes | Wild     | Hunan     |
| A/mallard/Jiangxi/6845/2003           | HM145573 | HM145404 | HM145235 | HM145066 | HM144729 | HM144897 | H6N1 | Anseriformes | Wild     | Jiangxi   |
| A/duck/Hunan/5613/2003                | HM145716 | HM145547 | HM145378 | HM145209 | HM144871 | HM145040 | H6N5 | Anseriformes | Domestic | Hunan     |
| A/duck/Hunan/1469/2002                | HM145735 | HM145566 | HM145397 | HM145228 | HM144890 | HM145059 | H6N8 | Anseriformes | Domestic | Hunan     |
| A/chicken/Shaanxi/11/2012             | KC767264 | KC767257 | KC767258 | KC767260 | KC767262 | KC767263 | H9N2 | Galliformes  | Domestic | Shaanxi   |
| A/chicken/Henan/43/02                 | DQ064558 | DQ064531 | DQ064504 | DQ064450 | DQ064396 | DQ064477 | H9N2 | Galliformes  | Domestic | Henan     |
| A/chicken/Guangdong/V/2008            | JQ639783 | JQ639784 | JQ639785 | JQ639787 | JQ639789 | JQ639790 | H9N2 | Galliformes  | Domestic | Guangdong |
| A/chicken/Guangdong/47/01             | DQ064547 | DQ064521 | DQ064494 | DQ064440 | DQ064386 | DQ064467 | H9N2 | Galliformes  | Domestic | Guangdong |
| A/chicken/Guangdong/10/00             | DQ064545 | DQ064518 | DQ064491 | DQ064437 | DQ064383 | DQ064464 | H9N2 | Galliformes  | Domestic | Guangdong |
| A/chicken/Shandong/1/2008             | JQ904459 | JQ904460 | JQ904461 | JQ904462 | JQ904463 | JQ904464 | H9N2 | Galliformes  | Domestic | Shandong  |
| A/chicken/Fujian/25/00                | DQ064544 | DQ064517 | DQ064490 | DQ064436 | DQ064382 | DQ064463 | H9N2 | Galliformes  | Domestic | Fujian    |
| A/chicken/Shijiazhuang/2/98           | DQ064568 | DQ064541 | DQ064514 | DQ064460 | DQ064406 | DQ064487 | H9N2 | Galliformes  | Domestic | Hebei     |
| A/chicken/Guangdong/5/97              | DQ064549 | DQ064522 | DQ064495 | DQ064441 | DQ064387 | DQ064468 | H9N2 | Galliformes  | Domestic | Guangdong |
| A/chicken/Gansu/2/99                  | EF070740 | EF070739 | EF070738 | EF070735 | EF070737 | EF070736 | H9N2 | Galliformes  | Domestic | Gansu     |
| A/chicken/Hebei/L1/2006               | EU914201 | EU882861 | EU532061 | EU532044 | EU532036 | EU532055 | H9N2 | Galliformes  | Domestic | Hebei     |
| A/chicken/Shandong/02/2008            | JF795043 | JF795044 | JF795045 | JF795047 | JF795049 | JF795050 | H9N2 | Galliformes  | Domestic | Shandong  |
| A/chicken/Shandong/KD/2009            | JF795099 | JF795100 | JF795101 | JF795103 | JF795105 | JF795106 | H9N2 | Galliformes  | Domestic | Shandong  |
| A/chicken/Hebei/7/2008                | GQ202053 | GQ202052 | GQ202055 | GQ202054 | GQ202051 | GQ202050 | H9N2 | Galliformes  | Domestic | Hebei     |
| A/chicken/Hebei/C4/2008               | GQ202047 | GQ202046 | GQ202049 | GQ202048 | GQ202045 | GQ202044 | H9N2 | Galliformes  | Domestic | Hebei     |

|                               |          |          |          |          |          |          |       |              |          |              |
|-------------------------------|----------|----------|----------|----------|----------|----------|-------|--------------|----------|--------------|
| A/chicken/Shandong/LY-1/2008  | JF795107 | JF795108 | JF795109 | JF795111 | JF795113 | JF795114 | H9N2  | Galliformes  | Domestic | Shandong     |
| A/chicken/Guangdong/56/01     | DQ064550 | DQ064523 | DQ064496 | DQ064442 | DQ064388 | DQ064469 | H9N2  | Galliformes  | Domestic | Guangdong    |
| A/chicken/Guangxi/37/2005     | EU086233 | EU086232 | EU086231 | EU086229 | EU086227 | EU086230 | H9N2  | Galliformes  | Domestic | Guangxi      |
| A/chicken/Heilongjiang/48/01  | DQ064556 | DQ064529 | DQ064502 | DQ064448 | DQ064394 | DQ064475 | H9N2  | Galliformes  | Domestic | Heilongjiang |
| A/chicken/Hubei/C1/2007       | EU365368 | EU365369 | EU365370 | EU365372 | EU365374 | EU365375 | H9N2  | Galliformes  | Domestic | Hubei        |
| A/chicken/Jiangsu/7/2002      | FJ384748 | FJ384749 | FJ384750 | FJ384752 | FJ384754 | FJ384755 | H9N2  | Galliformes  | Domestic | Jiangsu      |
| A/duck/Wenzhou/771/2013       | KF260901 | KF260657 | KF260413 | KF259925 | KF259406 | KF260169 | H7N3  | Anseriformes | Domestic | Zhejiang     |
| A/chicken/Jiangsu/RD5/2013    | KF006411 | KF006412 | KF006413 | KF006415 | KF006417 | KF006418 | H10N9 | Galliformes  | Domestic | Jiangsu      |
| A/goose/Guangdong/7472/2012   | KF260721 | KF260477 | KF260233 | KF259745 | KF259226 | KF259989 | H7N7  | Anseriformes | Domestic | Guangdong    |
| A/duck/Jiangsu/10-d4/2011     | CY125004 | CY125005 | CY125006 | CY125008 | CY125010 | CY125011 | H11N3 | Anseriformes | Domestic | Jiangsu      |
| A/duck/Zhejiang/0224-6/2011   | JN605400 | JN605396 | JN605392 | JN605384 | JN605376 | JN605388 | H1N2  | Anseriformes | Domestic | Zhejiang     |
| A/duck/Shanghai/28-1/2009     | JX485433 | JX485432 | JX485431 | JX485429 | JX485427 | JX485430 | H4N2  | Anseriformes | Domestic | Shanghai     |
| A/duck/Jiangxi/21714/2011     | KF260751 | KF260507 | KF260263 | KF259775 | KF259256 | KF260019 | H11N9 | Anseriformes | Domestic | Jiangxi      |
| A/duck/Zhejiang/5/2011        | JX051226 | JX051227 | JX051228 | JX051230 | JX051232 | JX051233 | H3N3  | Anseriformes | Domestic | Zhejiang     |
| A/chicken/Guangxi/12/2004     | DQ366327 | DQ366328 | DQ366329 | DQ366331 | DQ366333 | DQ366334 | H5N1  | Galliformes  | Domestic | Guangxi      |
| A/duck/Anhui/56/2005          | HM172441 | HM172402 | HM172322 | HM172227 | HM172152 | HM172270 | H5N1  | Anseriformes | Domestic | Anhui        |
| A/duck/Hunan/3340/2006        | FJ784840 | FJ784824 | FJ784808 | FJ784792 | FJ784888 | FJ784872 | H5N1  | Anseriformes | Domestic | Hunan        |
| A/chicken/Shandong/A-1/2009   | HM172414 | HM172363 | HM172329 | HM172252 | HM172153 | HM172283 | H5N1  | Galliformes  | Domestic | Shandong     |
| A/chicken/Hunan/1/2009        | HM172425 | HM172367 | HM172333 | HM172255 | HM172150 | HM172268 | H5N1  | Galliformes  | Domestic | Hunan        |
| A/wild duck/Shantou/1737/2000 | CY031006 | EF597452 | EF597417 | EF597347 | AY651429 | AY651593 | H6N8  | Anseriformes | Wild     | Guangdong    |
| A/duck/Shandong/093/2004      | AY856861 | AY856862 | AY856863 | AY856864 | AY856865 | AY856866 | H5N1  | Anseriformes | Domestic | Shandong     |
| A/duck/Guangxi/12/2003        | EU263342 | EU263343 | EU263344 | EU263346 | EU263348 | EU263349 | H5N1  | Anseriformes | Domestic | Guangxi      |
| A/duck/Guangxi/27/2003        | EU263350 | EU263351 | EU263352 | EU263354 | EU263356 | EU263357 | H5N1  | Anseriformes | Domestic | Guangxi      |
| A/duck/Guangdong/wy24/2008    | CY091640 | CY091641 | CY091642 | CY091644 | CY091646 | CY091647 | H5N5  | Anseriformes | Domestic | Guangdong    |
| A/duck/Guangdong/wy19/2008    | CY091632 | CY091633 | CY091634 | CY091636 | CY091638 | CY091639 | H5N5  | Anseriformes | Domestic | Guangdong    |
| A/duck/Jiangsu/m234/2012      | JX507352 | JX507353 | JX507354 | JX507356 | JX507358 | JX507359 | H5N2  | Anseriformes | Domestic | Jiangsu      |
| A/wild duck/Shandong/628/2011 | JX534562 | JX534563 | JX534564 | JX534566 | JX534568 | JX534569 | H5N1  | Anseriformes | Wild     | Shandong     |
| A/duck/Jiangsu/1-15/2011      | KC282876 | KC282877 | KC282878 | KC282880 | KC282882 | KC282883 | H4N2  | Anseriformes | Domestic | Jiangsu      |
| A/goose/Guangdong/k0103/2010  | JQ973683 | JQ973684 | JQ973685 | JQ973687 | JQ973689 | JQ973690 | H5N5  | Anseriformes | Domestic | Guangdong    |
| A/duck/Shantou/728/2001       | HM145588 | HM145419 | HM145250 | HM145081 | HM144744 | HM144912 | H6N2  | Anseriformes | Domestic | Guangdong    |

|                                              |          |          |          |          |          |          |       |                |          |           |
|----------------------------------------------|----------|----------|----------|----------|----------|----------|-------|----------------|----------|-----------|
| A/quail/Jiangsu/k0104/2010                   | JQ973675 | JQ973676 | JQ973677 | JQ973679 | JQ973681 | JQ973682 | H5N5  | Galliformes    | Domestic | Jiangsu   |
| A/goose/Guangdong/xb/2001                    | DQ997528 | DQ997527 | DQ997526 | DQ997524 | DQ997521 | DQ997525 | H5N1  | Anseriformes   | Domestic | Guangdong |
| A/duck/Jiangxi/5748/2006                     | CY109327 | CY109328 | CY109329 | CY109331 | CY109333 | CY109334 | H6N2  | Anseriformes   | Domestic | Jiangxi   |
| A/duck/Jiangxi/21669/2009                    | KF260737 | KF260493 | KF260249 | KF259761 | KF259242 | KF260005 | H7N7  | Anseriformes   | Domestic | Jiangxi   |
| A/wild duck/Jiangxi/19831/2009               | KF260736 | KF260492 | KF260248 | KF259760 | KF259241 | KF260004 | H7N7  | Anseriformes   | Wild     | Jiangxi   |
| A/duck/Jiangxi/23008/2009                    | KF260739 | KF260495 | KF260251 | KF259763 | KF259244 | KF260007 | H7N7  | Anseriformes   | Domestic | Jiangxi   |
| A/duck/Hunan/S1607/2012                      | CY146609 | CY146610 | CY146611 | CY146613 | CY146615 | CY146616 | H11N9 | Anseriformes   | Domestic | Hunan     |
| A/chicken/Guangxi/GXc-1/2011                 | KF013909 | KF013916 | KF013915 | KF013913 | KF013911 | KF013914 | H1N2  | Galliformes    | Domestic | Guangxi   |
| A/duck/Guangxi/GXd-4/2011                    | KF013925 | KF013932 | KF013931 | KF013929 | KF013927 | KF013930 | H1N2  | Anseriformes   | Domestic | Guangxi   |
| A/duck/Guangxi/GXd-1/2011                    | KF013917 | KF013924 | KF013923 | KF013921 | KF013919 | KF013922 | H1N2  | Anseriformes   | Domestic | Guangxi   |
| A/duck/Guizhou/1560/2007                     | CY109647 | CY109648 | CY109649 | CY109651 | CY109653 | CY109654 | H6N8  | Anseriformes   | Domestic | Guizhou   |
| A/chicken/Jiangxi/2369/2010                  | KF260742 | KF260498 | KF260254 | KF259766 | KF259247 | KF260010 | H7N7  | Galliformes    | Domestic | Jiangxi   |
| A/duck/Nanjing/1102/2010                     | KC683700 | KC683701 | KC683702 | KC683704 | KC683706 | KC683707 | H4N8  | Anseriformes   | Domestic | Jiangsu   |
| A/domestic green-winged teal/Hunan/3450/2006 | KC690153 | KC690154 | KC690155 | KC690157 | KC690159 | KC690160 | H5N1  | Anseriformes   | Domestic | Hunan     |
| A/duck/Guizhou/1073/2007                     | CY109631 | CY109632 | CY109633 | CY109635 | CY109637 | CY109638 | H6N8  | Anseriformes   | Domestic | Guizhou   |
| A/duck/Yunnan/1282/2007                      | KF260775 | KF260531 | KF260287 | KF259799 | KF259280 | KF260043 | H11N9 | Anseriformes   | Domestic | Yunnan    |
| A/duck/Guangxi/912/2008                      | CY076889 | CY076890 | CY076891 | CY076893 | CY076895 | CY076896 | H4N2  | Anseriformes   | Domestic | Guangxi   |
| A/mallard/Jiangxi/6285/2004                  | HM145738 | HM145569 | HM145400 | HM145231 | HM144893 | HM145062 | H6N8  | Anseriformes   | Wild     | Jiangxi   |
| A/mallard/Jiangxi/10071/2005                 | HM145577 | HM145408 | HM145239 | HM145070 | HM144733 | HM144901 | H6N1  | Anseriformes   | Wild     | Jiangxi   |
| A/duck/Jiangxi/22041/2008                    | KF260749 | KF260505 | KF260261 | KF259773 | KF259254 | KF260017 | H4N9  | Anseriformes   | Domestic | Jiangxi   |
| A/duck/Guangdong/4323/2007                   | KF260766 | KF260522 | KF260278 | KF259790 | KF259271 | KF260034 | H11N9 | Anseriformes   | Domestic | Guangdong |
| A/duck/Beijing/61/05                         | EU492492 | EU492498 | EU492504 | EU492516 | EU492528 | EU492510 | H3N8  | Anseriformes   | Domestic | Beijing   |
| A/duck/Beijing/40/04                         | EU492488 | EU492494 | EU492500 | EU492512 | EU492524 | EU492506 | H3N8  | Anseriformes   | Domestic | Beijing   |
| A/duck/Hunan/8-19/2009                       | HQ285883 | HQ285884 | HQ285885 | HQ285887 | HQ285889 | HQ285890 | H4N2  | Anseriformes   | Domestic | Hunan     |
| A/duck/Guangxi/GXd-2/2012                    | KF013933 | KF013940 | KF013939 | KF013937 | KF013935 | KF013938 | H1N2  | Anseriformes   | Domestic | Guangxi   |
| A/duck/Hunan/S11547/2012                     | CY146577 | CY146578 | CY146579 | CY146581 | CY146583 | CY146584 | H4N9  | Anseriformes   | Domestic | Hunan     |
| A/egret/Hunan/1/2012                         | JX437691 | JX437686 | JX437688 | JX437689 | JX437684 | JX437687 | H9N2  | Pelecaniformes | Wild     | Hunan     |
| A/baikal teal/Xianghai/421/2011              | KC162238 | KC162237 | KC162236 | KC162241 | KC162239 | KC162240 | H9N2  | Anseriformes   | Wild     | Jilin     |
| A/duck/Hunan/S11200/2012                     | CY146553 | CY146554 | CY146555 | CY146557 | CY146559 | CY146560 | H4N6  | Anseriformes   | Domestic | Hunan     |
| A/chicken/Jilin/xw/2003                      | DQ997546 | DQ997545 | DQ997551 | DQ997549 | DQ997552 | DQ997550 | H5N1  | Galliformes    | Domestic | Jilin     |

|                             |          |          |          |          |          |          |      |                  |          |           |
|-----------------------------|----------|----------|----------|----------|----------|----------|------|------------------|----------|-----------|
| A/chicken/Guangdong/178/04  | AY737293 | AY737294 | AY737295 | AY737297 | AY737298 | AY737300 | H5N1 | Galliformes      | Domestic | Guangdong |
| A/duck/Guangdong/23/2004    | HM172432 | HM172387 | HM172321 | HM172230 | HM172140 | HM172300 | H5N1 | Anseriformes     | Domestic | Guangdong |
| A/duck/Hunan/70/2004        | HM172416 | HM172389 | HM172326 | HM172231 | HM172158 | HM172306 | H5N1 | Anseriformes     | Domestic | Hunan     |
| A/goose/Fujian/bb/2003      | DQ997404 | DQ997403 | DQ997401 | DQ997407 | DQ997402 | DQ997408 | H5N1 | Anseriformes     | Domestic | Fujian    |
| A/duck/Hunan/69/2004        | HM172422 | HM172384 | HM172325 | HM172229 | HM172155 | HM172307 | H5N1 | Anseriformes     | Domestic | Hunan     |
| A/chicken/Xinjiang/16/2005  | HM172420 | HM172383 | HM172351 | HM172219 | HM172125 | HM172267 | H5N1 | Galliformes      | Domestic | Xinjiang  |
| A/chicken/Anhui/39/2004     | HM172430 | HM172390 | HM172320 | HM172237 | HM172123 | HM172287 | H5N1 | Galliformes      | Domestic | Anhui     |
| A/shrike/Tibet/13/2006      | HM172410 | HM172364 | HM172341 | HM172222 | HM172131 | HM172281 | H5N1 | Passerine        | Wild     | Tibet     |
| A/wild duck/Hunan/021/2005  | EU329174 | EU329175 | EU329176 | EU329178 | EU329180 | EU329181 | H5N1 | Anseriformes     | Wild     | Hunan     |
| A/duck/Yunnan/5310/2006     | CY030886 | CY030887 | CY030888 | CY030890 | CY030892 | CY030893 | H5N1 | Anseriformes     | Domestic | Yunnan    |
| A/duck/Hubei/Hangmei01/2006 | EU594346 | EU594347 | EU594348 | EU594350 | EU594352 | EU594353 | H5N1 | Anseriformes     | Domestic | Hubei     |
| A/duck/Hubei/49/2005        | HM172449 | HM172360 | HM172311 | HM172216 | HM172119 | HM172263 | H5N1 | Anseriformes     | Domestic | Hubei     |
| A/chicken/Hunan/21/2005     | HM172427 | HM172393 | HM172353 | HM172233 | HM172141 | HM172293 | H5N1 | Galliformes      | Domestic | Hunan     |
| A/duck/Hubei/xn/2007        | KJ003984 | KJ003985 | KJ003986 | KJ003988 | KJ003990 | KJ003991 | H5N1 | Anseriformes     | Domestic | Hubei     |
| A/goose/Hubei/65/2005       | HM172450 | HM172358 | HM172312 | HM172215 | HM172117 | HM172262 | H5N1 | Anseriformes     | Domestic | Hubei     |
| A/chicken/Sichuan/81/2005   | HM172452 | HM172357 | HM172309 | HM172214 | HM172118 | HM172261 | H5N1 | Galliformes      | Domestic | Sichuan   |
| A/chicken/Hunan/41/2004     | HM172428 | HM172404 | HM172319 | HM172224 | HM172130 | HM172303 | H5N1 | Galliformes      | Domestic | Hunan     |
| A/chicken/Xinjiang/17/2005  | HM172435 | HM172399 | HM172345 | HM172225 | HM172161 | HM172276 | H5N1 | Galliformes      | Domestic | Xinjiang  |
| A/duck/Jiangxi/80/2005      | HM172437 | HM172391 | HM172339 | HM172242 | HM172151 | HM172290 | H5N1 | Anseriformes     | Domestic | Jiangxi   |
| A/duck/Guangdong/173/04     | AY737301 | AY737302 | AY737303 | AY737305 | AY737306 | AY737307 | H5N1 | Anseriformes     | Domestic | Guangdong |
| A/chicken/Xinjiang/54/2005  | HM172439 | HM172400 | HM172347 | HM172247 | HM172142 | HM172305 | H5N1 | Galliformes      | Domestic | Xinjiang  |
| A/chicken/Jiangxi/25/2004   | HM172483 | HM172479 | HM172475 | HM172467 | HM172459 | HM172471 | H5N1 | Galliformes      | Domestic | Jiangxi   |
| A/ostrich/Suzhou/097/2003   | JF732743 | JF732745 | JF732741 | JF732744 | JF732740 | JF732742 | H5N1 | Struthioniformes | Domestic | Jiangsu   |
| A/chicken/Xinjiang/67/2005  | HM172436 | HM172398 | HM172349 | HM172239 | HM172154 | HM172302 | H5N1 | Galliformes      | Domestic | Xinjiang  |
| A/chicken/Xinjiang/28/2006  | HM172445 | HM172386 | HM172346 | HM172248 | HM172144 | HM172289 | H5N1 | Galliformes      | Domestic | Xinjiang  |
| A/chicken/Xinjiang/78/2005  | HM172446 | HM172397 | HM172343 | HM172246 | HM172143 | HM172278 | H5N1 | Galliformes      | Domestic | Xinjiang  |
| A/duck/Guangxi/xa/2001      | DQ997519 | DQ997518 | DQ997517 | DQ997515 | DQ997520 | DQ997516 | H5N1 | Anseriformes     | Domestic | Guangxi   |
| A/chicken/Xinjiang/68/2005  | HM172447 | HM172392 | HM172348 | HM172256 | HM172145 | HM172299 | H5N1 | Galliformes      | Domestic | Xinjiang  |
| A/parrot/Guangdong/C99/2005 | JX013487 | JX013488 | JX013489 | JX013490 | JX013491 | JX013492 | H5N1 | Psittaciiformes  | Domestic | Guangdong |
| A/duck/Shanghai/xj/2002     | DQ997530 | DQ997529 | DQ997535 | DQ997533 | DQ997536 | DQ997534 | H5N1 | Anseriformes     | Domestic | Shanghai  |

|                                          |          |          |          |          |          |          |      |                 |          |          |
|------------------------------------------|----------|----------|----------|----------|----------|----------|------|-----------------|----------|----------|
| A/duck/Zhejiang/bj/2002                  | DQ997416 | DQ997415 | DQ997414 | DQ997412 | DQ997409 | DQ997413 | H5N1 | Anseriformes    | Domestic | Zhejiang |
| A/duck/Hubei/wp/2003                     | DQ997169 | DQ997168 | DQ997167 | DQ997165 | DQ997170 | DQ997166 | H5N1 | Anseriformes    | Domestic | Hubei    |
| A/duck/Anhui/1/06                        | HM172409 | HM172401 | HM172356 | HM172238 | HM172133 | HM172304 | H5N1 | Anseriformes    | Domestic | Anhui    |
| A/chicken/Jiangsu/18/2008                | HM172417 | HM172368 | HM172352 | HM172234 | HM172134 | HM172275 | H5N1 | Galliformes     | Domestic | Jiangsu  |
| A/chicken/Sheny/0606/2008                | JQ277222 | JQ277223 | JQ277224 | JQ277226 | JQ277228 | JQ277229 | H5N1 | Galliformes     | Domestic | Liaoning |
| A/chicken/Shandong/A-5/2006              | HM172444 | HM172382 | HM172316 | HM172235 | HM172164 | HM172296 | H5N1 | Galliformes     | Domestic | Shandong |
| A/chicken/Shanxi/2/2006                  | DQ914812 | DQ914811 | DQ914813 | DQ914815 | DQ914817 | DQ914818 | H5N1 | Galliformes     | Domestic | Shanxi   |
| A/chicken/Shanxi/10/2006                 | HM172440 | HM172361 | HM172337 | HM172243 | HM172135 | HM172297 | H5N1 | Galliformes     | Domestic | Shanxi   |
| A/chicken/Shandong/A-10/2006             | HM172418 | HM172376 | HM172327 | HM172244 | HM172139 | HM172274 | H5N1 | Galliformes     | Domestic | Shandong |
| A/chicken/Liaoning/A-11/2006             | HM172431 | HM172362 | HM172355 | HM172250 | HM172148 | HM172308 | H5N1 | Galliformes     | Domestic | Liaoning |
| A/chicken/Hebei/102/2005                 | EU243139 | EU243138 | EU243137 | EU243135 | EF175672 | EU243136 | H5N1 | Galliformes     | Domestic | Hebei    |
| A/chicken/Henan/A-7/2006                 | HM172434 | HM172374 | HM172340 | HM172236 | HM172127 | HM172291 | H5N1 | Galliformes     | Domestic | Henan    |
| A/chicken/Hebei/126/2005                 | EU243140 | EU243141 | EU243142 | EU243144 | EF175673 | EU243143 | H5N1 | Galliformes     | Domestic | Hebei    |
| A/chicken/Hebei/326/2005                 | DQ351871 | DQ351875 | DQ351868 | DQ351865 | DQ351859 | DQ351862 | H5N1 | Galliformes     | Domestic | Hebei    |
| A/duck/Guangxi/GXd-5/2010                | JX304761 | JX304760 | JX304759 | JX304757 | JX304755 | JX304758 | H6N1 | Anseriformes    | Domestic | Guangxi  |
| A/duck/Hunan/S4234/2011                  | CY146705 | CY146706 | CY146707 | CY146709 | CY146711 | CY146712 | H5N1 | Anseriformes    | Domestic | Hunan    |
| A/wild duck/Jilin/HF/2011                | JX534570 | JX534571 | JX534572 | JX534574 | JX534576 | JX534577 | H5N1 | Anseriformes    | Wild     | Jilin    |
| A/wild duck/Jilin/ZF/2011                | JX534578 | JX534579 | JX534580 | JX534582 | JX534584 | JX534585 | H5N1 | Anseriformes    | Wild     | Jilin    |
| A/chicken/Jiangsu/k0402/2010             | JQ638687 | JQ638685 | JQ638683 | JQ638679 | JQ638675 | JQ638681 | H5N1 | Galliformes     | Domestic | Jiangsu  |
| A/wild duck/Shandong/2/2011              | JX534554 | JX534555 | JX534556 | JX534558 | JX534560 | JX534561 | H5N1 | Anseriformes    | Wild     | Shandong |
| A/goose/Jiangsu/k0403/2010               | JQ638688 | JQ638686 | JQ638684 | JQ638680 | JQ638676 | JQ638682 | H5N1 | Anseriformes    | Domestic | Jiangsu  |
| A/great crested-grebe/Qinghai/1/2009     | CY063315 | CY063316 | CY063317 | CY063319 | CY063321 | CY063322 | H5N1 | Anseriformes    | Wild     | Qinghai  |
| A/brown-headed gull/Qinghai/9/2009       | GU477557 | GU477554 | GU477551 | GU477545 | GU477539 | GU477536 | H5N1 | Charadriiformes | Wild     | Qinghai  |
| A/great black-headed gull/Qinghai/8/2009 | GU477556 | GU477553 | GU477550 | GU477544 | GU477538 | GU477535 | H5N1 | Charadriiformes | Wild     | Qinghai  |
| A/chicken/Tibet/6/2008                   | HM172426 | HM172380 | HM172328 | HM172258 | HM172162 | HM172282 | H5N1 | Galliformes     | Domestic | Tibet    |
| A/chicken/Guizhou/7/2008                 | HM172424 | HM172370 | HM172323 | HM172259 | HM172157 | HM172279 | H5N1 | Galliformes     | Domestic | Guizhou  |
| A/duck/Hunan/8/2008                      | GU182163 | GU182164 | GU182165 | GU182167 | GU182169 | GU182170 | H5N1 | Anseriformes    | Domestic | Hunan    |
| A/swan/Shanghai/10/2009                  | JF975558 | JF975559 | JF975560 | JF975562 | JF975564 | JF975565 | H5N1 | Anseriformes    | Wild     | Shanghai |
| A/bar-headed goose/Qinghai/1-HVRI/2006   | HM172415 | HM172365 | HM172332 | HM172218 | HM172132 | HM172284 | H5N1 | Anseriformes    | Wild     | Qinghai  |
| A/bar-headed goose/Qinghai/3/2005        | HM172481 | HM172477 | HM172474 | HM172465 | HM172457 | HM172470 | H5N1 | Anseriformes    | Wild     | Qinghai  |

|                                       |          |          |          |          |          |          |      |              |          |           |
|---------------------------------------|----------|----------|----------|----------|----------|----------|------|--------------|----------|-----------|
| A/wild duck/Liaoning/8/2006           | HM172423 | HM172403 | HM172314 | HM172226 | HM172146 | HM172269 | H5N1 | Anseriformes | Wild     | Liaoning  |
| A/chicken/Liaoning/23/2005            | HM172482 | HM172478 | HM172473 | HM172466 | HM172458 | HM172469 | H5N1 | Galliformes  | Domestic | Liaoning  |
| A/pied magpie/Liaoning/7/2006         | HM172484 | HM172480 | HM172476 | HM172468 | HM172460 | HM172472 | H5N1 | Passerine    | Wild     | Liaoning  |
| A/bar-headed goose/Tibet/8/2006       | HM172419 | HM172372 | HM172318 | HM172249 | HM172128 | HM172277 | H5N1 | Anseriformes | Wild     | Tibet     |
| A/great cormorant/Tibet/12/2006       | HM172408 | HM172378 | HM172317 | HM172253 | HM172121 | HM172292 | H5N1 | Anseriformes | Wild     | Tibet     |
| A/chicken/Tibet/LZ01/2010             | JX565016 | JX565017 | JX565018 | JX565020 | JX565022 | JX565023 | H5N2 | Galliformes  | Domestic | Tibet     |
| A/chicken/Hunan/8/2008                | GU182155 | GU182156 | GU182157 | GU182159 | GU182162 | GU182161 | H5N1 | Galliformes  | Domestic | Hunan     |
| A/chicken/Hunan/3/2007                | GU182139 | GU182140 | GU182141 | GU182143 | GU182145 | GU182146 | H5N1 | Galliformes  | Domestic | Hunan     |
| A/duck/Hunan/3/2007                   | GU182147 | GU182148 | GU182149 | GU182151 | GU182153 | GU182154 | H5N1 | Anseriformes | Domestic | Hunan     |
| A/duck/Hunan/11/2007                  | HM172407 | HM172381 | HM172331 | HM172245 | HM172160 | HM172273 | H5N1 | Anseriformes | Domestic | Hunan     |
| A/chicken/Fujian/1/2007               | HM172421 | HM172373 | HM172335 | HM172223 | HM172122 | HM172272 | H5N1 | Galliformes  | Domestic | Fujian    |
| A/duck/Hunan/29/2006                  | HM172405 | HM172379 | HM172334 | HM172221 | HM172129 | HM172294 | H5N1 | Anseriformes | Domestic | Hunan     |
| A/goose/Yunnan/3798/2006              | CY030902 | CY030903 | CY030904 | CY030906 | CY030908 | CY030909 | H5N1 | Anseriformes | Domestic | Yunnan    |
| A/goose/Yunnan/4371/2006              | CY030910 | CY030911 | CY030912 | CY030914 | CY030916 | CY030917 | H5N1 | Anseriformes | Domestic | Yunnan    |
| A/goose/Guangdong/1/1996              | AF144300 | AF144301 | AF144302 | AF144303 | AF144306 | AF144307 | H5N1 | Anseriformes | Domestic | Guangdong |
| A/duck/Fujian/5476/2008               | KF260723 | KF260479 | KF260235 | KF259747 | KF259228 | KF259991 | H7N7 | Anseriformes | Domestic | Fujian    |
| A/mallard/Jiangxi/10668/2005          | HM145578 | HM145409 | HM145240 | HM145071 | HM144734 | HM144902 | H6N1 | Anseriformes | Wild     | Jiangxi   |
| A/black-billed magpie/Guangxi/29/2005 | GU121379 | GU121380 | GU121381 | GU121383 | GU121385 | GU121386 | H9N2 | Passerine    | Wild     | Guangxi   |
| A/chicken/Jilin/hd/2002               | DQ997289 | DQ997288 | DQ997287 | DQ997285 | DQ997290 | DQ997286 | H5N1 | Galliformes  | Domestic | Jilin     |
| A/chicken/Guangdong/1/2005            | EU874902 | EU874903 | EU874897 | EU874898 | EU874901 | EU874904 | H5N1 | Galliformes  | Domestic | Guangdong |
| A/duck/Fujian/7794/2007               | CY109895 | CY109896 | CY109897 | CY109899 | CY109901 | CY109902 | H6N6 | Anseriformes | Domestic | Fujian    |
| A/duck/Shantou/494/2007               | CY109735 | CY109736 | CY109737 | CY109739 | CY109741 | CY109742 | H6N6 | Anseriformes | Domestic | Guangdong |
| A/chicken/Rizhao/1436/2013            | KF260952 | KF260708 | KF260464 | KF259976 | KF259457 | KF260220 | H9N2 | Galliformes  | Domestic | Shandong  |
| A/duck/Guangxi/890/2007               | CY109599 | CY109600 | CY109601 | CY109603 | CY109605 | CY109606 | H6N8 | Anseriformes | Domestic | Guangxi   |
| A/chicken/Henan/13/2004               | AY950282 | AY950275 | AY950268 | AY950254 | AY950240 | AY950261 | H5N1 | Galliformes  | Domestic | Henan     |
| A/chicken/Henan/01/2004               | AY950279 | AY950272 | AY950265 | AY950251 | AY950237 | AY950258 | H5N1 | Galliformes  | Domestic | Henan     |
| A/duck/Hunan/908/2005                 | HM145698 | HM145529 | HM145360 | HM145191 | HM144853 | HM145022 | H6N2 | Anseriformes | Domestic | Hunan     |
| A/chicken/Wenzhou/606/2013            | KF260933 | KF260689 | KF260445 | KF259957 | KF259438 | KF260201 | H9N2 | Galliformes  | Domestic | Zhejiang  |
| A/duck/Guangxi/13/2004                | DQ366335 | DQ366336 | DQ366337 | DQ366339 | DQ366341 | DQ366342 | H5N1 | Anseriformes | Domestic | Guangxi   |
| A/pigeon/Nanchang/2-0461/2000         | CY005512 | CY005511 | CY005510 | CY005509 | CY005507 | CY006020 | H9N2 | Passerine    | Wild     | Jiangxi   |

|                                       |          |          |          |          |          |          |      |              |          |           |
|---------------------------------------|----------|----------|----------|----------|----------|----------|------|--------------|----------|-----------|
| A/wild waterfowl/Dongting/PC2562/2012 | KF972106 | KF972107 | KF972108 | KF972110 | KF972112 | KF972113 | H9N2 | Anseriformes | Wild     | Hunan     |
| A/duck/Shantou/1522/2001              | HM145593 | HM145424 | HM145255 | HM145086 | HM144749 | HM144917 | H6N2 | Anseriformes | Domestic | Guangdong |
| A/duck/Fujian/3193/2005               | HM145705 | HM145536 | HM145367 | HM145198 | HM144860 | HM145029 | H6N2 | Anseriformes | Domestic | Fujian    |
| A/duck/Fujian/3354/2006               | CY109519 | CY109520 | CY109521 | CY109523 | CY109525 | CY109526 | H6N6 | Anseriformes | Domestic | Fujian    |
| A/duck/Hubei/2/2010                   | CY110946 | CY110947 | CY110948 | CY110950 | CY110952 | CY110953 | H6N6 | Anseriformes | Domestic | Hubei     |
| A/duck/Jiangxi/7348/2007              | CY109703 | CY109704 | CY109705 | CY109707 | CY109709 | CY109710 | H6N2 | Anseriformes | Domestic | Jiangxi   |
| A/duck/Fujian/5643/2005               | HM145711 | HM145542 | HM145373 | HM145204 | HM144866 | HM145035 | H6N2 | Anseriformes | Domestic | Fujian    |
| A/duck/Shantou/10124/2006             | CY110339 | CY110340 | CY110341 | CY110343 | CY110345 | CY110346 | H6N2 | Anseriformes | Domestic | Guangdong |
| A/chicken/Rizhao/723/2013             | KF260946 | KF260702 | KF260458 | KF259970 | KF259451 | KF260214 | H9N2 | Galliformes  | Domestic | Shandong  |
| A/chicken/Guangxi/G8/2009             | KF367736 | KF367737 | KF367738 | KF367739 | KF367741 | KF367742 | H9N2 | Galliformes  | Domestic | Guangxi   |
| A/chicken/Jiangxi/SD001/2013          | CY146945 | CY146946 | CY146947 | CY146949 | CY146951 | CY146952 | H7N9 | Galliformes  | Domestic | Jiangxi   |
| A/duck/Jiangxi/25186/2009             | KF260741 | KF260497 | KF260253 | KF259765 | KF259246 | KF260009 | H7N6 | Anseriformes | Domestic | Jiangxi   |
| A/duck/Guangxi/1248/2006              | CY109239 | CY109240 | CY109241 | CY109243 | CY109245 | CY109246 | H6N2 | Anseriformes | Domestic | Guangxi   |
| A/mallard/Jiangxi/8346/2004           | HM145719 | HM145550 | HM145381 | HM145212 | HM144874 | HM145043 | H6N5 | Anseriformes | Wild     | Jiangxi   |
| A/duck/Hunan/748/2005                 | HM145721 | HM145552 | HM145383 | HM145214 | HM144876 | HM145045 | H6N5 | Anseriformes | Domestic | Hunan     |
| A/duck/Jiangxi/16769/2010             | KF260746 | KF260502 | KF260258 | KF259770 | KF259251 | KF260014 | H7N7 | Anseriformes | Domestic | Jiangxi   |
| A/duck/Hunan/573/2002                 | HM145645 | HM145476 | HM145307 | HM145138 | HM144800 | HM144969 | H6N2 | Anseriformes | Domestic | Hunan     |
| A/Muscovy duck/Fujian/CL/1997         | JF916710 | JF916711 | JF916712 | JF916714 | JF916716 | JF916717 | H9N2 | Anseriformes | Wild     | Fujian    |
| A/chicken/Jiangsu/1/00                | DQ064561 | DQ064534 | DQ064507 | DQ064453 | DQ064399 | DQ064480 | H9N2 | Galliformes  | Domestic | Jiangsu   |
| A/chicken/Hebei/4/2008                | FJ499468 | FJ499467 | FJ499470 | FJ499469 | FJ499466 | FJ499465 | H9N2 | Galliformes  | Domestic | Hebei     |
| A/wild duck/Hunan/211/2005            | EU329189 | EU329188 | EU329187 | EU329185 | EU329183 | EU329182 | H5N1 | Anseriformes | Wild     | Hunan     |
| A/duck/Zhejiang/2/2011                | JQ906561 | JQ906565 | JQ906569 | JQ906577 | JQ906585 | JQ906589 | H7N3 | Anseriformes | Domestic | Zhejiang  |
| A/chicken/Guangdong/191/04            | AY737286 | AY737287 | AY737288 | AY737290 | AY737292 | AY737285 | H5N1 | Galliformes  | Domestic | Guangdong |
| A/duck/Guizhou/5302/2007              | CY109663 | CY109664 | CY109665 | CY109667 | CY109669 | CY109670 | H6N2 | Anseriformes | Domestic | Guizhou   |
| A/wild waterfowl/Dongting/C2032/2011  | KF971946 | KF971947 | KF971948 | KF971950 | KF971952 | KF971953 | H9N2 | Anseriformes | Wild     | Hunan     |
| A/chicken/Hubei/489/2004              | AY770084 | AY770083 | AY770082 | AY770081 | AY770077 | AY770080 | H5N1 | Galliformes  | Domestic | Hubei     |
| A/wild duck/Fujian/2/2011             | JX534594 | JX534595 | JX534596 | JX534598 | JX534600 | JX534601 | H5N1 | Anseriformes | Wild     | Fujian    |
| A/duck/Anhui/SC702/2013               | CY147057 | CY147058 | CY147059 | CY147061 | CY147063 | CY147064 | H7N9 | Anseriformes | Domestic | Anhui     |
| A/mallard/SanJiang/151/2006           | EF592492 | EF592493 | EF592494 | EF592496 | EF592498 | EF592499 | H6N2 | Anseriformes | Wild     | Guangxi   |
| A/duck/Fujian/10774/2006              | CY109575 | CY109576 | CY109577 | CY109579 | CY109581 | CY109582 | H6N6 | Anseriformes | Domestic | Fujian    |



|                                     |          |          |          |          |          |          |       |                 |          |           |
|-------------------------------------|----------|----------|----------|----------|----------|----------|-------|-----------------|----------|-----------|
| A/duck/Fujian/4276/2006             | CY109535 | CY109536 | CY109537 | CY109539 | CY109541 | CY109542 | H6N2  | Anseriformes    | Domestic | Fujian    |
| A/duck/Zhejiang/0607-13/2011        | JN605401 | JN605397 | JN605393 | JN605385 | JN605377 | JN605389 | H1N2  | Anseriformes    | Domestic | Zhejiang  |
| A/chicken/Wenzhou/645/2013          | KF260919 | KF260675 | KF260431 | KF259943 | KF259424 | KF260187 | H7N7  | Galliformes     | Domestic | Zhejiang  |
| A/duck/Hunan/S4111/2011             | CY146657 | CY146658 | CY146659 | CY146661 | CY146663 | CY146664 | H9N2  | Anseriformes    | Domestic | Hunan     |
| A/brown-headed gull/Qinghai/19/2009 | GU477558 | GU477555 | GU477552 | GU477546 | GU477540 | GU477537 | H5N1  | Charadriiformes | Wild     | Qinghai   |
| A/duck/Tibet/S2/2009                | CY087184 | CY087185 | CY087186 | CY087188 | CY087190 | CY087191 | H9N2  | Anseriformes    | Domestic | Tibet     |
| A/duck/Fujian/6388/2010             | KF260726 | KF260482 | KF260238 | KF259750 | KF259231 | KF259994 | H7N3  | Anseriformes    | Domestic | Fujian    |
| A/duck/Yangzhou/02/2005             | EF061121 | EF061124 | EF061120 | EF061123 | EF061125 | EF061119 | H8N4  | Anseriformes    | Domestic | Jiangsu   |
| A/duck/Guizhou/2773/2006            | CY109303 | CY109304 | CY109305 | CY109307 | CY109309 | CY109310 | H6N2  | Anseriformes    | Domestic | Guizhou   |
| A/chicken/Guangdong/174/04          | AY609309 | AY609310 | AY609311 | AY609313 | AY609315 | AY609316 | H5N1  | Galliformes     | Domestic | Guangdong |
| A/duck/Hunan/S11893/2012            | CY146593 | CY146594 | CY146595 | CY146597 | CY146599 | CY146600 | H4N6  | Anseriformes    | Domestic | Hunan     |
| A/duck/Yangzhou/013/2008            | GU220596 | GU220597 | GU220598 | GU220600 | GU220602 | GU220603 | H6N5  | Anseriformes    | Domestic | Jiangsu   |
| A/wild duck/Jiangxi/19615/2009      | KF260735 | KF260491 | KF260247 | KF259759 | KF259240 | KF260003 | H7N8  | Anseriformes    | Wild     | Jiangxi   |
| A/chicken/Henan/5/98                | DQ064559 | DQ064532 | DQ064505 | DQ064451 | DQ064397 | DQ064478 | H9N2  | Galliformes     | Domestic | Henan     |
| A/chicken/Shanghai/10/01            | DQ064567 | DQ064540 | DQ064513 | DQ064459 | DQ064405 | DQ064486 | H9N2  | Galliformes     | Domestic | Shanghai  |
| A/duck/Zhejiang/2245/2011           | JN646697 | JN646704 | JN646711 | JN646725 | JN646739 | JN646746 | H5N1  | Anseriformes    | Domestic | Zhejiang  |
| A/quail/Nanchang/7-026/2000         | CY005460 | CY005459 | CY005458 | CY005456 | CY005454 | CY005457 | H3N6  | Galliformes     | Domestic | Jiangxi   |
| A/wild duck/Shantou/992/2000        | CY117380 | CY117379 | CY117378 | CY117376 | CY117374 | CY117377 | H2N8  | Anseriformes    | Wild     | Guangdong |
| A/duck/Jiangxi/3190/2009            | KF260716 | KF260472 | KF260228 | KF259740 | KF259221 | KF259984 | H7N9  | Anseriformes    | Domestic | Jiangxi   |
| A/Baikal teal/Hongze/14/2005        | GQ203121 | GQ203120 | GQ203119 | GQ169501 | GQ219716 | GQ219715 | H11N9 | Anseriformes    | Wild     | Jiangsu   |
| A/chicken/Ningxia/24/2006           | HM172443 | HM172375 | HM172336 | HM172241 | HM172136 | HM172285 | H5N1  | Galliformes     | Domestic | Ningxia   |
| A/duck/Hunan/S4150/2011             | CY146689 | CY146690 | CY146691 | CY146693 | CY146695 | CY146696 | H5N1  | Anseriformes    | Domestic | Hunan     |
| A/duck/Shantou/6847/2004            | HM145669 | HM145500 | HM145331 | HM145162 | HM144824 | HM144993 | H6N2  | Anseriformes    | Domestic | Guangdong |
| A/pigeon/Shanghai/S1421/2013        | CY147177 | CY147178 | CY147179 | CY147181 | CY147183 | CY147184 | H7N9  | Passerine       | Wild     | Shanghai  |

Sequence name, subtype, host order, host type and region types are summarized in each column.

(page intentionally blank)

**Table S10: Original predictor data per province**

Predictor data are referenced from the China statistical year book 2013 and the China agriculture yearbook 2012. The table is separated into three parts for display. The predictor name keys (and units) are listed at the end.

| Province       | Agriculture |        |        |         |         |      |      |         |          |
|----------------|-------------|--------|--------|---------|---------|------|------|---------|----------|
|                | 1           | 2      | 3      | 4       | 5       | 6    | 7    | 8       | 9        |
| Beijing        | 20.09       | 15.24  | 15.87  | 2662.8  | 1584.34 | 1700 | 1700 | 154.16  | 3658.52  |
| Tianjin        | 0.73        | 18.66  | 11.87  | 2315.5  | 2049.12 | 612  | 612  | 105.01  | 6485.19  |
| Hebei          | 3.86        | 342.56 | 99.91  | 35668.3 | 1877.28 | 2466 | 431  | 1747.66 | 9628.07  |
| Shanxi         | 2.77        | 74.69  | 10.25  | 6282.1  | 305.25  | 1435 | 482  | 298.83  | 5101.21  |
| Inner Mongolia | 1.92        | 54.46  | 32.02  | 4735.5  | 40.03   | 2493 | 774  | 1118.86 | 25875.66 |
| Liaoning       | 28.78       | 279.9  | 137.43 | 39152.2 | 2687.18 | 4594 | 1338 | 1621.23 | 17585.47 |
| Jilin          | 10.7        | 100.25 | 78.19  | 15302.8 | 816.58  | 1818 | 824  | 1130.36 | 21768.51 |
| Heilongjiang   | 3.42        | 108.15 | 36.04  | 13715.9 | 289.98  | 2192 | 759  | 1350.68 | 28180.14 |
| Shanghai       | 23.33       | 5.9    | 6.48   | 1420    | 2239.75 | 4043 | 4043 | 72.59   | 2015.71  |
| Jiangsu        | 8.73        | 197.2  | 156.59 | 34741.9 | 3386.15 | 9486 | 1255 | 1226.18 | 5337.15  |
| Zhejiang       | 12.35       | 48.14  | 38.26  | 12416.4 | 1219.69 | 8446 | 2320 | 549.04  | 6934.74  |
| Anhui          | 19.87       | 122.65 | 115.35 | 23906   | 1712.46 | 1992 | 533  | 1119.73 | 10392.83 |
| Fujian         | 3.77        | 25.36  | 40.88  | 8424.2  | 693.92  | 1817 | 306  | 481.28  | 6741.12  |
| Jiangxi        | 6.2         | 45.79  | 60.6   | 19451.6 | 1165.46 | 1656 | 502  | 752.68  | 6937.5   |
| Shandong       | 37.72       | 401.99 | 287.41 | 58330.5 | 3715.32 | 2472 | 462  | 2285.92 | 12157.98 |
| Henan          | 5.87        | 404.17 | 139.66 | 64642   | 3870.78 | 2463 | 887  | 2255.61 | 8957.36  |
| Hubei          | 2.8         | 139.36 | 67.91  | 29812.3 | 1603.67 | 2217 | 825  | 1334.04 | 7446.51  |
| Hunan          | 2.1         | 95.18  | 60.56  | 27563.8 | 1301.41 | 2331 | 948  | 1488.58 | 5179.18  |
| Guangdong      | 10.81       | 31.81  | 159.26 | 36998.9 | 2057.78 | 8836 | 1660 | 1134.14 | 4342.63  |
| Guangxi        | 7.77        | 21.82  | 141.43 | 30282.6 | 1281.53 | 1741 | 512  | 1072.77 | 8992.57  |
| Hainan         | 16.68       | 3.58   | 27.87  | 4666.7  | 1375.8  | 431  |      | 214.14  | 8829.15  |
| Chongqing      | 8.63        | 40.05  | 40.64  | 11627.5 | 1400.9  | 1735 | 1735 | 453.9   | 9653.81  |
| Sichuan        | 3.97        | 146.44 | 120.5  | 37519.8 | 773.6   | 4151 | 2129 | 2269.86 | 10218.22 |
| Guizhou        | 2.45        | 14.65  | 17.57  | 7698.1  | 436.9   | 1128 | 417  | 421.55  | 7956.99  |
| Yunnan         | 2.21        | 22.13  | 39.19  | 11949.6 | 303.29  | 1657 | 736  | 912.97  | 14409    |
| Tibet          | 0.09        | 0.43   | 0.17   | 122.6   | 1       | 131  | 48   | 59.02   | 43715.73 |
| Shaanxi        | 1.39        | 51.86  | 9.29   | 6255    | 303.94  | 1335 | 600  | 598.72  | 5888.58  |
| Gansu          | 1.13        | 14.7   | 6.59   | 3676.6  | 80.8    | 1322 | 399  | 231.72  | 13124.41 |
| Qinghai        | 0.08        | 2.01   | 1.08   | 242.2   | 3.36    | 561  | 326  | 137.08  | 15663.33 |
| Ningxia        | 2.37        | 6.18   | 2.5    | 884.5   | 133.21  | 1126 | 573  | 105.72  | 16077.68 |
| Xinjiang       | 4.27        | 25.89  | 19.91  | 2964.6  | 17.81   | 1479 | 633  | 485.37  | 29085.38 |

| Province          | Resource and Environment |           |           |           |            |            |             |             |            |            |            |
|-------------------|--------------------------|-----------|-----------|-----------|------------|------------|-------------|-------------|------------|------------|------------|
|                   | 10                       | 11        | 12        | 13        | 14         | 15         | 16          | 17          | 18         | 19         | 20         |
| Beijing           | 1038.58                  | 7.97      | 12.8<br>5 | 51        | 733.2      | 2450.<br>2 | 39.5        | 17.95       | 6.68       | 9.38       | 17.75      |
| Tianjin           | 198.89                   | 8.06      | 12.5<br>3 | 57        | 755.3      | 2174.<br>4 | 32.94       | 26.54       | 8.41       | 22.45      | 33.42      |
| Hebei             | 8374.08                  | 3.61      | 13.9<br>6 | 54.6<br>7 | 649.4      | 2288.<br>2 | 235.53      | 117.76      | 123.5<br>9 | 134.1<br>2 | 176.1<br>1 |
| Shanxi            | 7643.67                  | 7.44      | 10.6<br>5 | 51.1<br>7 | 427.8      | 2618.<br>6 | 106.25      | 65.9        | 107.0<br>9 | 130.1<br>8 | 124.4      |
| Inner<br>Mongolia | 117720.5<br>1            | 11.5<br>7 | 7.15      | 46.8<br>3 | 551.4      | 2677.<br>8 | 510.25      | 349.24      | 83.3       | 138.4<br>9 | 141.8<br>9 |
| Liaoning          | 20226.85                 | 12.3<br>9 | 7.43      | 68.5      | 786        | 2577.<br>2 | 547.3       | 492.42      | 72.63      | 105.8<br>7 | 103.6<br>3 |
| Jilin             | 84412.29                 | 12.4<br>3 | 5.23      | 63        | 718.3      | 2438.<br>3 | 460.47      | 387.33      | 26.48      | 40.35      | 57.59      |
| Heilongjiang      | 152104.9<br>6            | 14.8<br>5 | 4.62      | 67.1<br>7 | 740.8      | 1773.<br>8 | 841.41      | 695.69      | 69.93      | 51.43      | 78.06      |
| Shanghai          | 100.95                   | 5.22      | 16.8<br>7 | 69.5      | 1103.<br>7 | 1676.<br>7 | 33.9        | 27.35       | 8.71       | 22.82      | 40.16      |
| Jiangsu           | 3501.75                  | 4.1       | 15.9<br>8 | 68.0<br>8 | 917.2      | 1939.<br>1 | 373.33      | 279.14      | 44.32      | 99.2       | 147.9<br>6 |
| Zhejiang          | 17223.14                 | 1.53      | 17.1<br>1 | 70.7<br>5 | 1728.<br>8 | 1520.<br>5 | 1444.7<br>9 | 1427.1<br>5 | 25.4       | 62.58      | 80.88      |
| Anhui             | 13755.41                 | 3.76      | 16.4<br>9 | 73.0<br>8 | 936.4      | 1912.<br>8 | 701         | 640.64      | 46.21      | 51.96      | 92.13      |
| Fujian            | 48436.28                 | 3.11      | 20.1<br>8 | 75.1<br>7 | 1913.<br>4 | 1291.<br>3 | 1511.4<br>4 | 1510.0<br>7 | 25.26      | 37.13      | 46.72      |
| Jiangxi           | 39529.64                 | 7.55      | 18.0<br>3 | 77.0<br>8 | 2059.<br>8 | 1622       | 2174.3<br>6 | 2155.7<br>9 | 35.74      | 56.77      | 57.71      |
| Shandong          | 6338.53                  | 4.71      | 14.3<br>4 | 55.1<br>7 | 569.1      | 2146       | 274.3       | 182.17      | 69.53      | 174.8<br>8 | 173.9      |
| Henan             | 12936.12                 | 4.4       | 15.4<br>6 | 53.1<br>7 | 498.7      | 1883.<br>7 | 265.54      | 172.65      | 59.98      | 127.5<br>9 | 162.5<br>9 |
| Hubei             | 20942.49                 | 5.14      | 16.3<br>7 | 81.4<br>2 | 1415.<br>5 | 1553.<br>9 | 813.88      | 783.76      | 34.97      | 62.24      | 64         |
| Hunan             | 34906.67                 | 6.07      | 17.5<br>9 | 76.4<br>2 | 1730       | 1493.<br>6 | 1988.9<br>4 | 1981.3<br>1 | 34.07      | 64.5       | 60.72      |
| Guangdong         | 30183.37                 | 6.73      | 21.6<br>7 | 81.5<br>8 | 1813.<br>9 | 1471.<br>2 | 2026.5<br>5 | 2017.4<br>9 | 32.83      | 79.92      | 130.3<br>4 |
| Guangxi           | 46875.18                 | 5.98      | 21.4<br>2 | 79.7<br>5 | 1086.<br>8 | 1295.<br>7 | 2087.4      | 2086.3<br>6 | 29.97      | 50.41      | 49.83      |
| Hainan            | 7274.23                  | 6.97      | 24.5<br>8 | 81.9<br>2 | 2094.<br>3 | 1766.<br>4 | 364.31      | 360.22      | 1.66       | 3.41       | 10.34      |
| Chongqing         | 11331.85                 | 10.3<br>2 | 18.3      | 71.7<br>5 | 1104.<br>4 | 812        | 476.89      | 476.89      | 18.23      | 56.48      | 38.27      |
| Sichuan           | 159572.3<br>7            | 18.5<br>4 | 15.8<br>6 | 78.0<br>8 | 610.9      | 780.6      | 2892.3<br>6 | 2891.2<br>1 | 29.58      | 86.44      | 65.9       |
| Guizhou           | 24007.96                 | 5.41      | 13.6<br>5 | 84.5<br>8 | 1226.<br>4 | 681.6      | 974.02      | 974.02      | 29.45      | 104.1<br>1 | 56.35      |
| Yunnan            | 155380.0<br>9            | 7.45      | 16.3<br>3 | 66.8<br>3 | 802.1      | 2554.<br>2 | 1689.7<br>7 | 1689.7<br>7 | 39.06      | 67.22      | 54.43      |
| Tibet             | 224550.9<br>1            | 33.9<br>1 | 9.61      | 33.5      | 365.2      | 3162.<br>9 | 4196.3<br>5 | 4196.3<br>5 | 0.66       | 0.42       | 4.43       |
| Shaanxi           | 33820.54                 | 5.65      | 14.1<br>7 | 61.7<br>5 | 385.3      | 1922       | 390.49      | 367.96      | 46.21      | 84.38      | 80.81      |
| Gansu             | 19363.83                 | 16.1<br>7 | 7.54      | 57.4<br>2 | 231.2      | 2600.<br>2 | 266.95      | 258.95      | 20.76      | 57.25      | 47.34      |
| Qinghai           | 3915.64                  | 30.2<br>1 | 5.22      | 59        | 446.1      | 2655.<br>2 | 895.22      | 879.21      | 15.64      | 15.39      | 12.61      |
| Ningxia           | 492.14                   | 10.3<br>4 | 9.81      | 48        | 292.7      | 2728.<br>3 | 10.81       | 8.45        | 19.83      | 40.66      | 45.54      |
| Xinjiang          | 30100.54                 | 12.9<br>5 | 7.39      | 53.0<br>8 | 286.9      | 2864.<br>6 | 900.63      | 851.6       | 69.61      | 79.61      | 81.95      |

| Province       | Population |          |          |          |          |          |         | Transportation |          |        |       |
|----------------|------------|----------|----------|----------|----------|----------|---------|----------------|----------|--------|-------|
|                | 21         | 22       | 23       | 24       | 25       | 26       | 27      | 28             | 29       | 30     | 31    |
| Beijing        | 2069.3     | 1231.213 | 1783.737 | 86.2     | 285.5634 | 13.8     | 1231.21 | 26161.91       | 1236.91  | 24925  | 0     |
| Tianjin        | 1413.15    | 1250.575 | 1152.424 | 86.2     | 260.7262 | 18.45    | 1250.58 | 46015.2        | 7909.2   | 27735  | 10371 |
| Hebei          | 7287.51    | 383.5532 | 3410.555 | 86.2     | 3876.955 | 53.2     | 383.55  | 219130.28      | 21010.28 | 195530 | 2590  |
| Shanxi         | 3610.83    | 175.4534 | 1850.911 | 86.2     | 1759.919 | 48.74    | 175.45  | 144607.93      | 71427.93 | 73150  | 30    |
| Inner Mongolia | 2489.85    | 21.04691 | 1437.639 | 86.2     | 1052.211 | 42.26    | 21.05   | 189942.25      | 64682.25 | 125260 | 0     |
| Liaoning       | 4389       | 301.2354 | 2881.379 | 65.65    | 1507.622 | 34.35    | 301.24  | 206788.68      | 19802.68 | 174355 | 12631 |
| Jilin          | 2750.4     | 146.7663 | 1476.965 | 53.7     | 1273.435 | 46.3     | 146.77  | 54808.12       | 7347.12  | 47130  | 331   |
| Heilongjiang   | 3834       | 81.05708 | 2181.546 | 56.9     | 1652.454 | 43.1     | 81.06   | 65230.66       | 16590.66 | 47465  | 1175  |
| Shanghai       | 2380.43    | 3754.621 | 2125.724 | 89.3     | 254.706  | 10.7     | 3754.62 | 94038.29       | 825.29   | 42911  | 50302 |
| Jiangsu        | 7919.98    | 771.9279 | 4989.587 | 63       | 2930.393 | 37       | 771.93  | 220007.48      | 7670.48  | 153698 | 58639 |
| Zhejiang       | 5477       | 538.0157 | 3461.464 | 63.2     | 2015.536 | 36.8     | 538.02  | 191817.32      | 4607.32  | 113393 | 73817 |
| Anhui          | 5988       | 428.9398 | 2784.42  | 46.5     | 3203.58  | 53.5     | 428.94  | 312436.77      | 12259.77 | 259461 | 40716 |
| Fujian         | 3748       | 308.7315 | 2233.808 | 59.6     | 1514.192 | 40.4     | 308.73  | 84345.09       | 3814.09  | 59431  | 21100 |
| Jiangxi        | 4503.93    | 269.8581 | 2139.818 | 47.51    | 2364.114 | 52.49    | 269.86  | 127195.53      | 5561.53  | 113703 | 7931  |
| Shandong       | 9684.97    | 616.8771 | 5077.83  | 52.43    | 4607.14  | 47.57    | 616.88  | 333602.6       | 23144.6  | 296754 | 13704 |
| Henan          | 9406       | 563.2335 | 3990.966 | 42.43    | 5415.034 | 57.57    | 563.23  | 272114.94      | 12637.94 | 251772 | 7705  |
| Hubei          | 5779       | 310.8661 | 3091.765 | 53.5     | 2687.235 | 46.5     | 310.87  | 122945.35      | 5882.35  | 97136  | 19927 |
| Hunan          | 6638.93    | 313.4528 | 3097.061 | 46.65    | 3541.869 | 53.35    | 313.45  | 191051.75      | 5676.75  | 166670 | 18705 |
| Guangdong      | 10594      | 589.2102 | 7140.356 | 67.4     | 3453.644 | 32.6     | 589.21  | 256076.69      | 9305.69  | 189034 | 57737 |
| Guangxi        | 4682       | 198.138  | 2038.075 | 43.53    | 2643.925 | 56.47    | 198.14  | 161356.01      | 6846.01  | 135112 | 19398 |
| Hainan         | 886.55     | 261.365  | 457.4598 | 51.6     | 429.0902 | 48.4     | 261.36  | 26880.39       | 752.39   | 16600  | 9528  |
| Chongqing      | 2945       | 354.8193 | 1678.061 | 56.98    | 1266.939 | 43.02    | 354.82  | 86474.05       | 2328.05  | 71272  | 12874 |
| Sichuan        | 8076.2     | 166.5196 | 3515.57  | 43.53    | 4560.63  | 56.47    | 166.52  | 174349.34      | 8793.34  | 158396 | 7160  |
| Guizhou        | 3484.07    | 197.7338 | 1268.55  | 36.41    | 2215.52  | 63.59    | 197.73  | 52654.92       | 6664.92  | 44892  | 1098  |
| Yunnan         | 4659       | 118.2487 | 1831.453 | 39.31    | 2827.547 | 60.69    | 118.25  | 68734.88       | 5030.88  | 63239  | 465   |
| Tibet          | 307.62     | 2.504233 | 69.98355 | 22.75    | 237.6365 | 77.25    | 2.5     | 1126.63        | 84.63    | 1042   | 0     |
| Shaanxi        | 3753.09    | 182.3659 | 1877.321 | 50.02067 | 1875.769 | 49.97933 | 182.37  | 136726.79      | 31941.79 | 104593 | 192   |
| Gansu          | 2577.55    | 56.64945 | 998.8006 | 38.75    | 1578.749 | 61.25    | 56.65   | 45831.67       | 6289.67  | 39517  | 25    |
| Qinghai        | 573.17     | 7.960694 | 271.9118 | 47.44    | 301.2582 | 52.56    | 7.96    | 13483.92       | 3783.92  | 9700   | 0     |
| Ningxia        | 647.19     | 97.46837 | 327.9312 | 50.67    | 319.2588 | 49.33    | 97.47   | 41113.31       | 8467.31  | 32646  | 0     |
| Xinjiang       | 2232.78    | 13.41    | 981.98   | 43.98    | 1250.8   | 56.02    | 13.41   | 58793.53       | 6839.53  | 51954  | 0     |

## Predictor names key

- 1 Sales of Poultry Per Capita Rural Household (kg)
- 2 Output of Poultry Eggs (10 000 tons)
- 3 Output of Poultry meat (10 000 tons)
- 4 poultry population at the end of year (10000 unit)
- 5 poultry density (10000unit/km<sup>2</sup>)
- 6 number of farm product market (region) (unit)
- 7 number of farm product market (city) (unit)
- 8 Gross Output Value of Animal Husbandry (100 million yuan)
- 9 Original Value of Productive Fixed Assets of Rural Households at Year-end ( )
- 10 Stock Volume of Forest (10 000 cu.m)
- 11 Percentage of Nature Reserves in the Region (%)
- 12 Average Temperature of Major Cities (°C)
- 13 Average Relative Humidity of Major Cities (%)
- 14 Average Precipitation of Major Cities (milimeters)
- 15 Average Sunshine Hours of Major Cities (Hours)
- 16 Total Amount of Water Resources (100 million cu.m)
- 17 Surface Water Resources (100 million cu.m)
- 18 Smoke and Dust (10 000 tons)
- 19 Sulphur Dioxide (10 000 tons)
- 20 Nitrogen Oxides (10 000 tons)
- 21 Population at Year-end by Region (10 000 persons)
- 22 population density ( )
- 23 Urban Population (Population)
- 24 Urban Population (%)
- 25 Rural Population (Population)
- 26 Rural Population (%)
- 27 population density (10000 persons/km<sup>2</sup>)
- 28 Freight Traffic by Region total (10 000 tons)
- 29 Freight Traffic by Region railway (10 000 tons)
- 30 Freight Traffic by Region Highways (10 000 tons)
- 31 Freight Traffic by Region Waterways (10 000 tons)
